# Supplementary material
Source: bioRxiv or medRxiv preprint supplement (https://www.biorxiv.org/highwire/filestream/44305/field_highwire_adjunct_files/0/053041-1.pdf)
Supplement: Supplementary file [file 053041-1.pdf]

- 1 Comprehensive analysis of RNA-sequencing to find the source of 1 trillion reads across
- 2 diverse adult human tissues
- 3 Supplementary Materials
- 4

|    |                                                                                        |    |
|----|----------------------------------------------------------------------------------------|----|
| 5  | Table of Contents                                                                      |    |
| 6  | <i>Supplementary Figures</i> .....                                                     | 6  |
| 7  | Supplemental Figure S1. Edit distance of lost human reads. ....                        | 6  |
| 8  | Supplemental Figure S2. Genomic profile of mapped and lost human reads. ....           | 76 |
| 9  | Supplemental Figure S3. Profile of repeat elements. ....                               | 10 |
| 10 | Supplemental Figure S4. Distribution of non-co-linear (NCL) events across samples. ... | 18 |
| 11 | Supplemental Figure S5. Number of NCL events across tissues and library preparation    |    |
| 12 | protocols. ....                                                                        | 19 |
| 13 | Supplemental Figure S6. Percentage of immune reads mapped to B-cell receptor (BCR)     |    |
| 14 | and T-cell receptor (TCR) loci. ....                                                   | 81 |
| 15 | Supplemental Figure S7. Percentage of immune reads mapped to genes encoding the        |    |
| 16 | constant region of immunoglobulin heavy locus (IGH). ....                              | 83 |
| 17 | Supplemental Figure S8. Combinatorial diversity of immunoglobulin kappa locus (IGK)    |    |
| 18 | locus across tissues. ....                                                             | 26 |
| 19 | Supplemental Figure S9. Association between microbial load and immune diversity. ....  | 27 |
| 20 | Supplemental Figure S10. Combinatorial diversity of immunoglobulin lambda locus (IGL)  |    |
| 21 | locus differentiates disease status. ....                                              | 28 |
| 22 | Supplemental Figure S11. Combinatorial diversity of T cell receptor beta (TCRB) locus  |    |
| 23 | differentiates disease status. ....                                                    | 30 |
| 24 | Supplemental Figure S12. Combinatorial diversity of T cell receptor gamma (TCRG) locus |    |
| 25 | differentiates disease status. ....                                                    | 31 |
| 26 | Supplemental Figure S13. Distribution of hyper-edited reads. ....                      | 15 |

|    |                                                                                        |    |
|----|----------------------------------------------------------------------------------------|----|
| 27 | Supplemental Figure 14. The sequence context of the Figure S13. The sequence context   |    |
| 28 | of the detected hyper-edited A-to-G sites.....                                         | 16 |
| 29 | Supplemental Figure S15. Profile of repeat elements across GTEx tissues. ....          | 7  |
| 30 | Supplemental Figure S16. Profile of DNA repeats across GTEx tissues.....               | 8  |
| 31 | Supplemental Figure S17. Profile of SVA retrotransposons across GTEx tissues.....      | 9  |
| 32 | Supplemental Figure S18. Number of VJ recombinations across GTEx human tissues for     |    |
| 33 | IGK chain. ....                                                                        | 23 |
| 34 | Supplemental Figure S19. Number of VJ recombinations across GTEx human tissues for     |    |
| 35 | IGL chain. ....                                                                        | 25 |
| 36 | Supplemental Figure S20. An example of coverage plot of EBV virus. Viral reads were    |    |
| 37 | obtained by ROP protocol from GTEx RNA-Seq sample of EBV-transformed                   |    |
| 38 | lymphoblastoid cell lines (LCLs).....                                                  | 21 |
| 39 | <i>Supplemental Tables</i> .....                                                       | 33 |
| 40 | Supplemental Table 1. RNA Seq-Data Overview.....                                       | 33 |
| 41 | Supplemental Table 2. Genomic profile across tissue types and library preparation      |    |
| 42 | methods.....                                                                           | 36 |
| 43 | Supplemental Table 3. Repeat profile across tissues types and library preparation      |    |
| 44 | methods.....                                                                           | 79 |
| 45 | Supplemental Table 4. Relative genomic abundance of microbial taxa at different levels |    |
| 46 | of taxonomic classification after removal of reads with human origin (average over all |    |
| 47 | samples of tissues). ....                                                              | 40 |

|    |                                                                                            |    |
|----|--------------------------------------------------------------------------------------------|----|
| 48 | Supplemental Table 5. Number of RNA-Seq reads mapped to BCR and TCR genes                  |    |
| 49 | (immune reads). .....                                                                      | 84 |
| 50 | Supplementary Table 6. Parameters for each RNA-Seq aligner for default, sensitive, and     |    |
| 51 | very sensitive settings. ....                                                              | 41 |
| 52 | Supplementary Table 7. Average mapping rate for different aligners with different          |    |
| 53 | sensitivities. ....                                                                        | 41 |
| 54 | <i>Supplemental Methods</i> .....                                                          | 42 |
| 55 | Subject Recruitment.....                                                                   | 42 |
| 56 | Sample Collection .....                                                                    | 43 |
| 57 | Whole Transcriptome Sequencing.....                                                        | 43 |
| 58 | Workflow to categorize the mapped reads .....                                              | 45 |
| 59 | <i>Map reads onto human genome and transcriptome</i> .....                                 | 45 |
| 60 | <i>Categorize mapped reads into genomic categories</i> .....                               | 45 |
| 61 | <i>Categorize mapped reads overlapping repeat instances</i> .....                          | 47 |
| 62 | <i>Categorize mapped reads overlapping B cell receptor (BCR) and T cell receptor (TCR)</i> |    |
| 63 | <i>loci</i> .....                                                                          | 51 |
| 64 | <i>Workflow for categorizing the unmapped reads</i> .....                                  | 54 |
| 65 | A. Quality Control .....                                                                   | 54 |
| 66 | B. Mapping unmapped reads onto the human references. ....                                  | 55 |
| 67 | C. Mapping unmapped reads onto the repeat sequences.....                                   | 56 |
| 68 | D. Workflow to detect ‘non-co-linear’ reads (trans-splicing, gene fusions, and             |    |
| 69 | circRNAs).....                                                                             | 57 |

|    |                                                                             |                                     |
|----|-----------------------------------------------------------------------------|-------------------------------------|
| 70 | <i>E. Mapping unmapped reads onto the V(D)J genes of antibody loci.....</i> | 58                                  |
| 71 | <i>F. Identification of microbial reads.....</i>                            | 61                                  |
| 72 | <b>Comparing diversity across groups .....</b>                              | <b>62</b>                           |
| 73 | <b>Percentage of unmapped reads calculation .....</b>                       | <b>63</b>                           |
| 74 | <b>Computational resources required to run ROP protocol ...</b>             | <b>Error! Bookmark not defined.</b> |
| 75 | <b>Complexity analysis using Capture Recapture Model .....</b>              | <b>69</b>                           |
| 76 | <i>Statistical Model .....</i>                                              | 70                                  |
| 77 | <b>Read Complexity Analysis.....</b>                                        | <b>71</b>                           |
| 78 | <b>Annotated Feature Complexity Analysis .....</b>                          | <b>72</b>                           |
| 79 | <b>List of software tools used: .....</b>                                   | <b>85</b>                           |
| 80 | <b>Databases.....</b>                                                       | <b>86</b>                           |
| 81 | <b>References: .....</b>                                                    | <b>87</b>                           |
| 82 |                                                                             |                                     |

83 *Supplementary Figures*

84

85

86

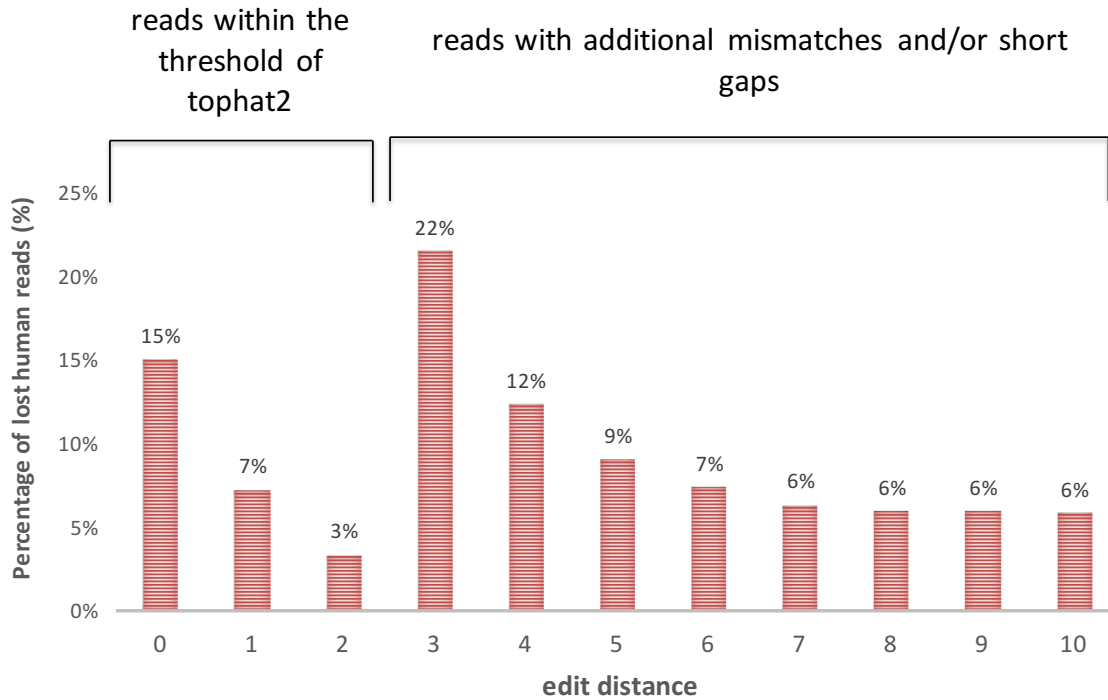

87

88 **Supplemental Figure S1. Edit distance of lost human reads.**

89 Unmapped reads were remapped to the human references using Megablast. Edit distance

90 was calculated as the minimum number of operations required to transform a read

91 sequence into the corresponding reference subsequence. Reads are grouped by edit

92 distance with the transcriptome or the genome reference. The percentages are the

93 averages across 10641 samples.

94

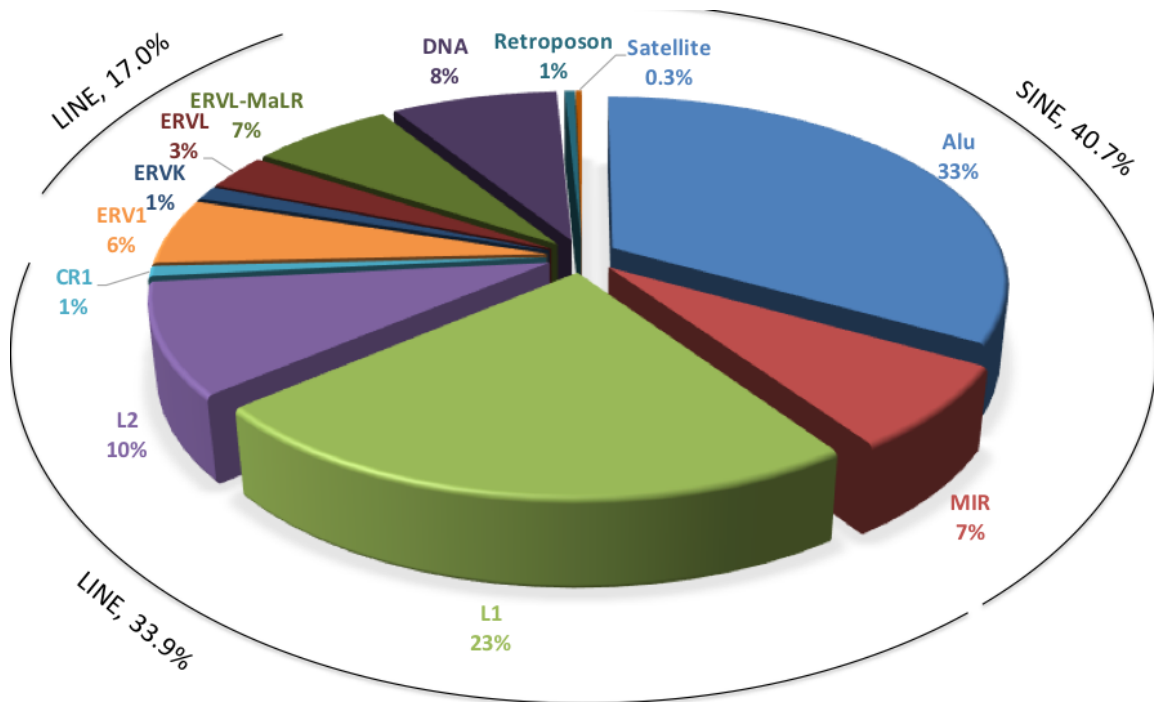

On average 7% of RNA-Seq reads are categorized as repeats

95

96 Supplemental Figure S2. Profile of repeat elements across based on repeat sequences  
 97 inferred from mapped and unmapped reads (lost repeat reads).

98 ROP identifies and categorizes repetitive sequences among the mapped and unmapped  
 99 reads. Mapped reads were categorized based on the overlap with the repeat instances  
 100 prepared from RepeatMasker annotation (Repeatmasker v3.3, Repeat Library 20120124).  
 101 Lost repeat reads are unmapped RNA-Seq reads aligned onto the reference repeat  
 102 sequences (prepared from Repbase v20.07). The percentages are the averages across  
 103 10641 samples.

104

105

106

## GTEx DNA repeats

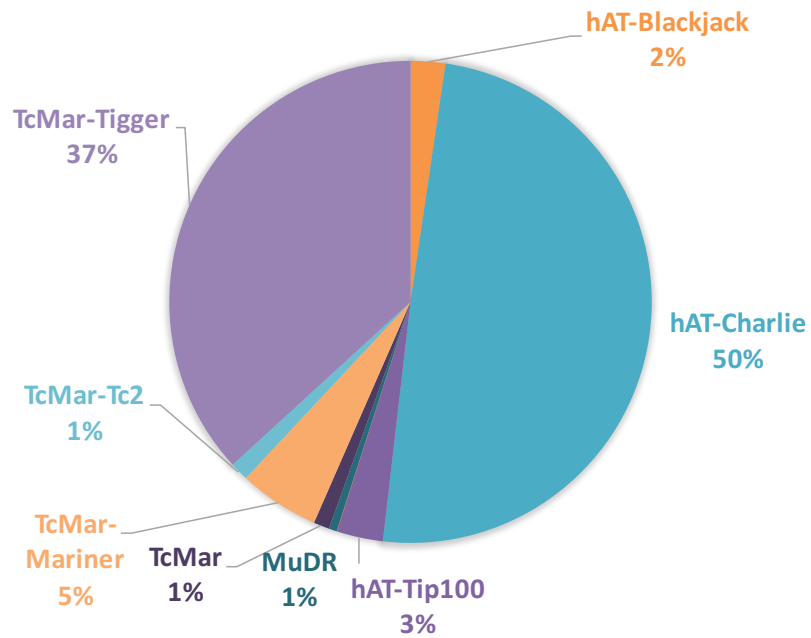

\*Percentages are calculated as a fraction from the reads matching DNA repeats

108

109 Supplemental Figure S3. Profile of DNA repeats based on repeat sequences inferred from  
 110 mapped and unmapped reads (lost repeat reads).

111 ROP identifies and categorizes DNA repetitive sequences among the mapped and  
 112 unmapped reads. Mapped reads were categorized based on the overlap with the repeat  
 113 instances prepared from RepeatMasker annotation (Repeatmasker v3.3, Repeat Library  
 114 20120124). Lost repeat reads are unmapped RNA-Seq reads aligned onto the reference  
 115 repeat sequences (prepared from Repbase v20.07). The percentages are the averages  
 116 across 10641 samples.

117



# SINE–VNTR–Alu (SVA)

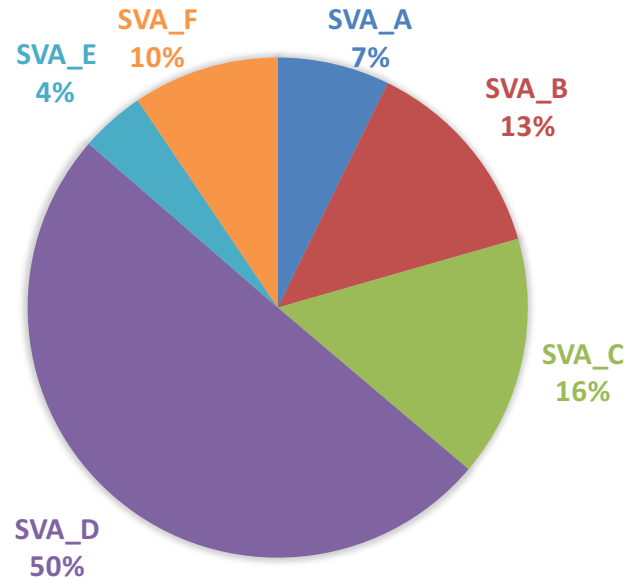

\*Percentages are calculated as a fraction from the reads matching SVA Retroposons

118

119

120 *Supplemental Figure S4. Profile of SVA retrotransposons based on repeat sequences*  
121 *inferred from mapped and unmapped reads (lost repeat reads). ROP identifies and*  
122 *categorizes SVA retrotransposons sequences among the mapped and unmapped reads.*  
123 *Mapped reads were categorized based on the overlap with the repeat instances prepared*  
124 *from RepeatMasker annotation (Repeatmasker v3.3, Repeat Library 20120124). Lost*  
125 *repeat reads are unmapped RNA-Seq reads aligned onto the reference repeat sequences*  
126 *(prepared from Repbase v20.07). The percentages are the averages across 10641 samples.*

127



## Average Number of SVA-F reads across Tissue

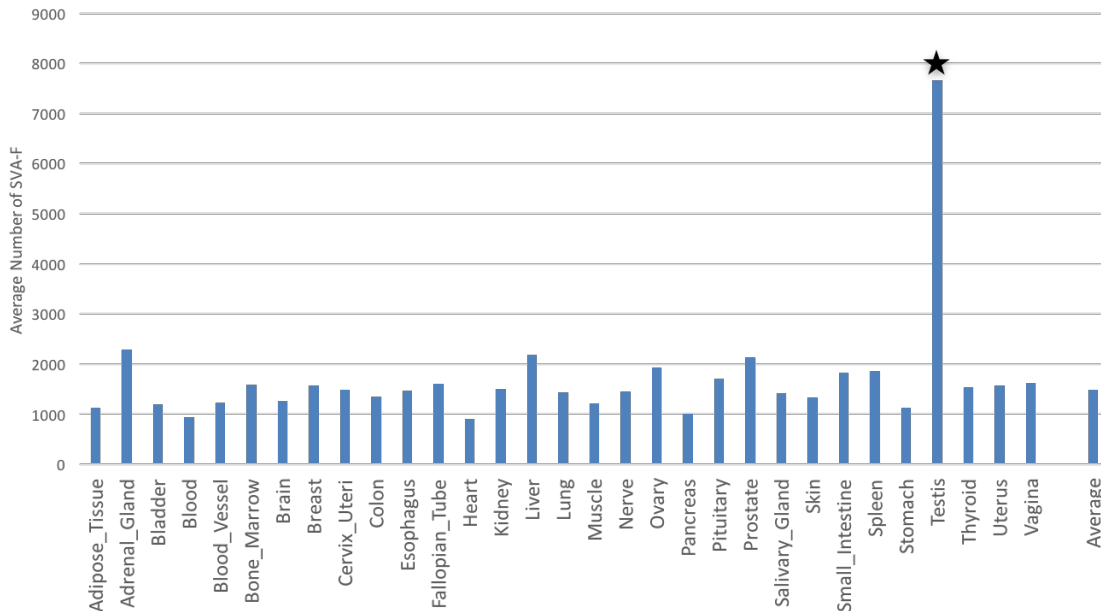

139

140

141 *Supplemental Figure 6. Average number of SVA-F reads across GTEx tissues.* ROP identifies  
 142 and categorizes SVA retrotransposons sequences among the mapped and unmapped  
 143 reads. Mapped reads were categorized based on the overlap with the repeat instances  
 144 prepared from RepeatMasker annotation (Repeatmasker v3.3, Repeat Library 20120124).  
 145 Lost repeat reads are unmapped RNA-Seq reads aligned onto the reference repeat  
 146 sequences (prepared from Repbase v20.07). Among the GTEx tissues, *testis* showed  
 147 significantly higher expression of SVA F retrotransposons compared to other tissues ( $p =$   
 148  $2.46 \times 10^{-33}$ )

## Alu and L1 co-expression in Individual Tissues

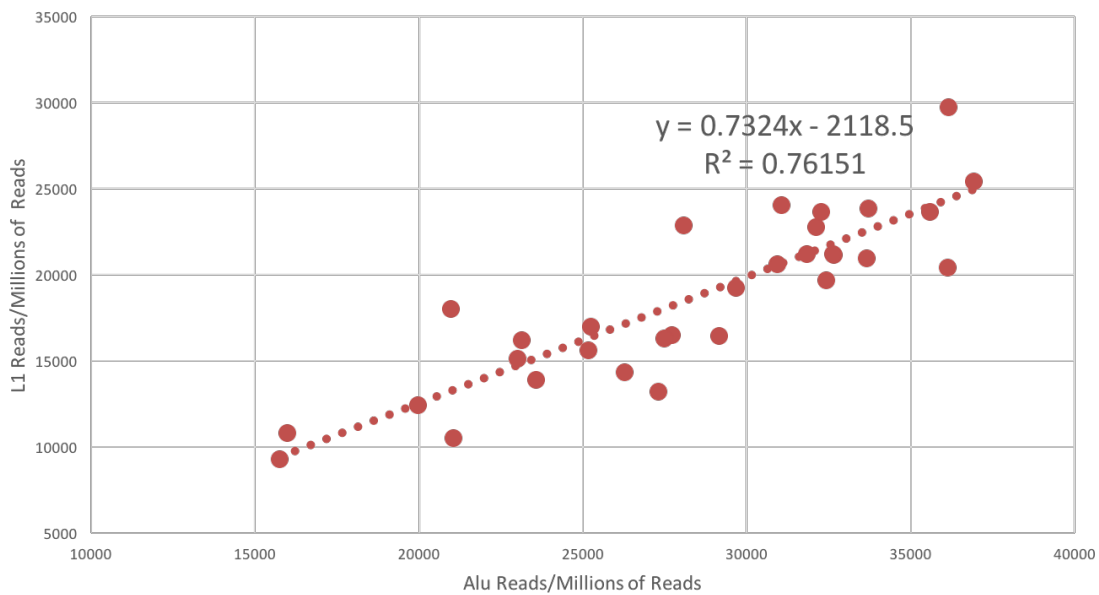

149

150

151 *Supplemental Figure 7. Co-expression of Alu and L1 elements across GTEx tissues. ROP*  
152 *identifies and categorizes repetitive sequences among the mapped and unmapped reads.*  
153 *Mapped reads were categorized based on the overlap with the repeat instances prepared*  
154 *from RepeatMasker annotation (Repeatmasker v3.3, Repeat Library 20120124). Lost*  
155 *repeat reads are unmapped RNA-Seq reads aligned onto the reference repeat sequences*  
156 *(prepared from Repbase v20.07).*

157

158



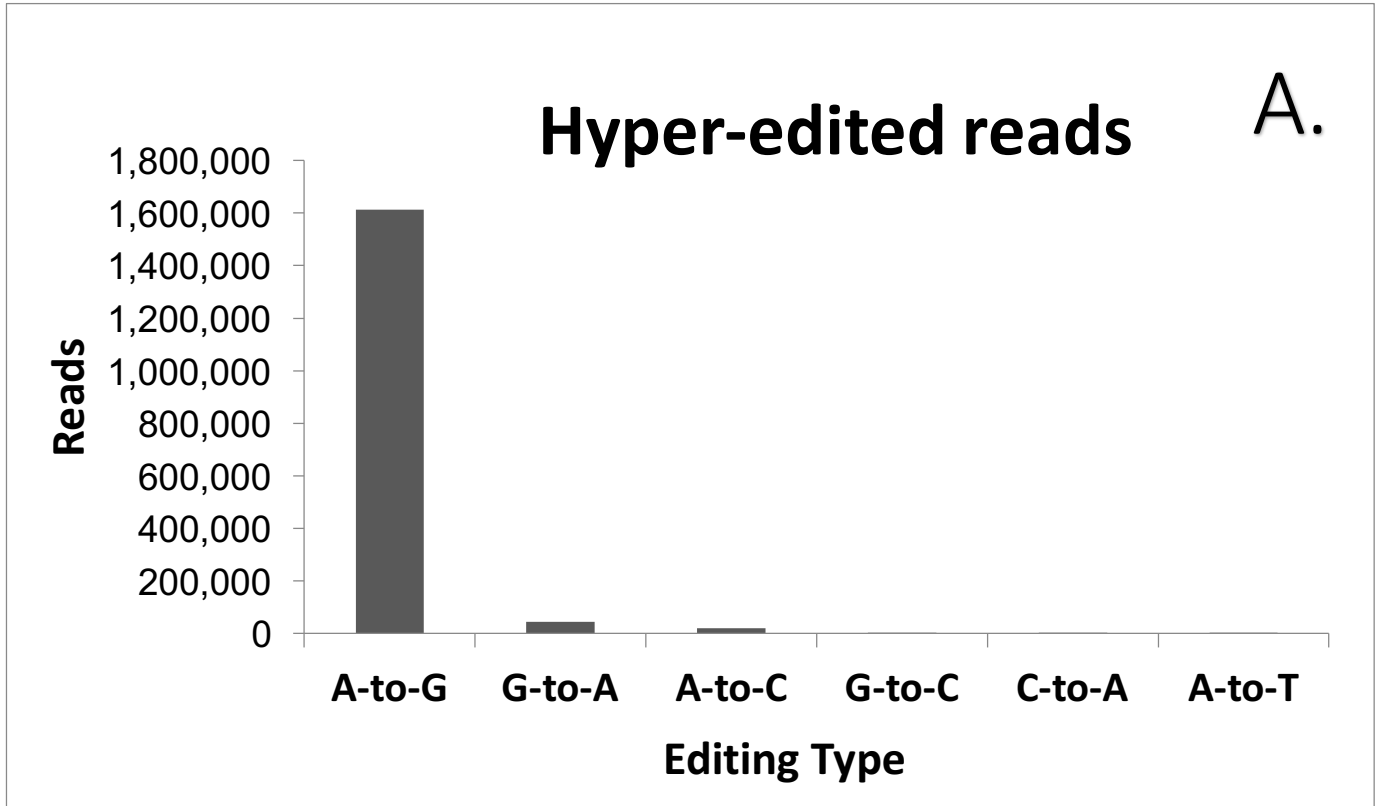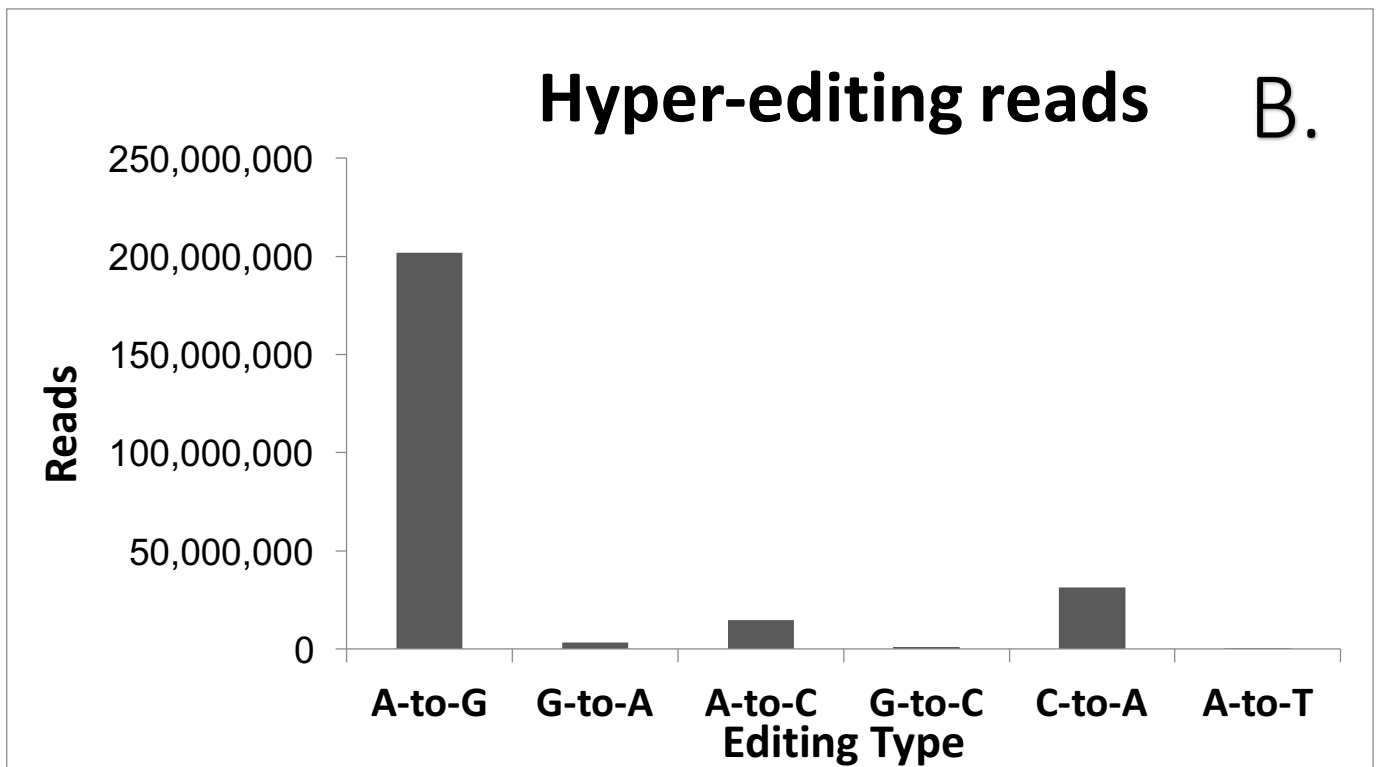

161 **Supplemental Figure S8. Distribution of hyper-edited reads.**

162 **A.** Hyper-editing identified in the in-house data. Results showed that 96% of the reads were  
163 A-to-G, indicating a high level of specificity for the hyper-editing screen. The 1,613,213  
164 detected A-to-G reads contain 10,666,458 editing events (3,157,685 unique editing-sites).

165 **B.** Hyper-editing identified in the GTEx RNA-Seq data. Results showed that 80% of the reads  
166 were A-to-G, indicating a high level of specificity for the hyper-editing screen. The  
167 201,676,069 detected A-to-G reads contain 1,130,591,911 editing events (690,386,562  
168 unique editing-sites).

169

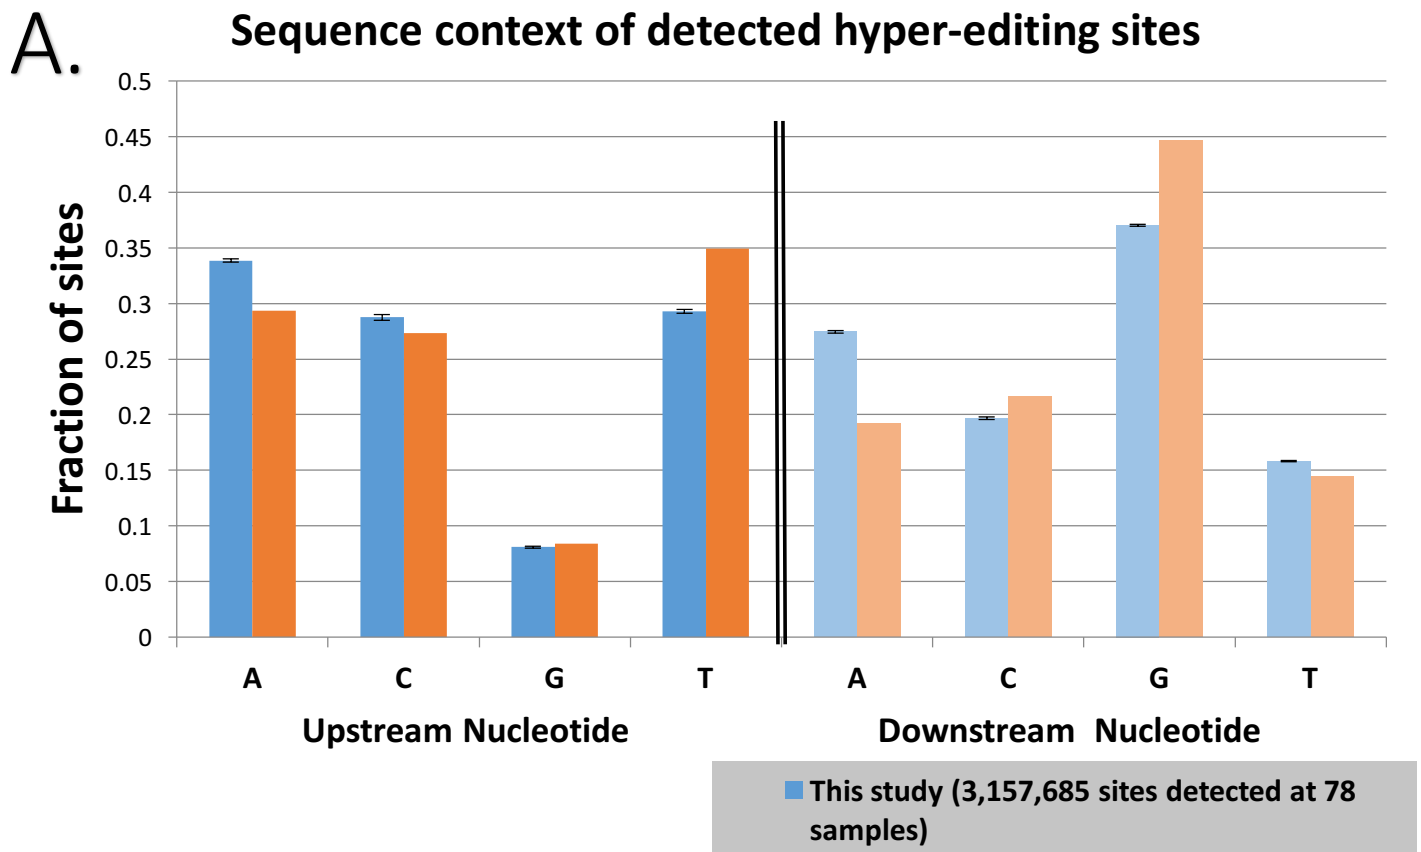

170

171

B.

172

173

174

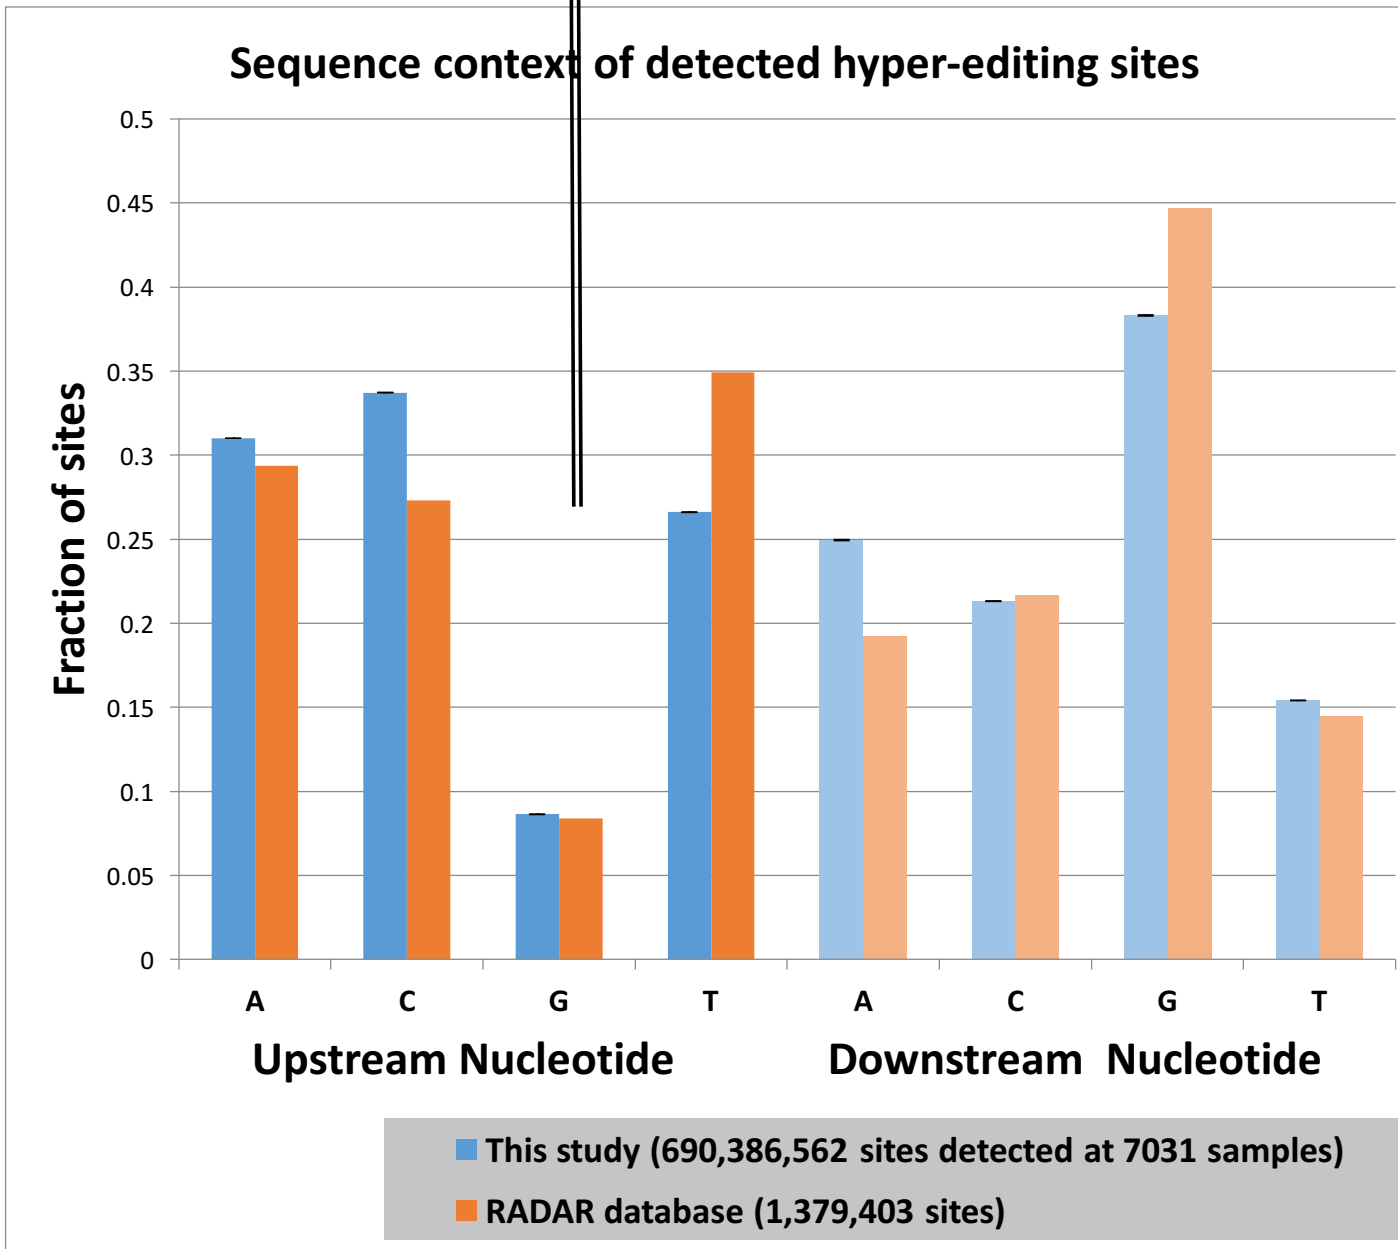



175 Supplemental Figure S9. The sequence context of the Figure S8. The sequence context of  
176 the detected hyper-edited A-to-G sites.

177 The sequence near the detected hyper-editing sites is depleted of Gs upstream and  
178 enriched with Gs downstream, in agreement with previously known data about the ADAR  
179 motif. The bars correspond to the fraction of editing sites with each type of nucleotide one  
180 base upstream and downstream of the site. Results are shown for sites detected in-house  
181 RNA-Seq data (A) and GTEx RNA-Seq data (B) using the hyper-editing pipeline and human  
182 editing-sites from the RADAR database.

183

184

185

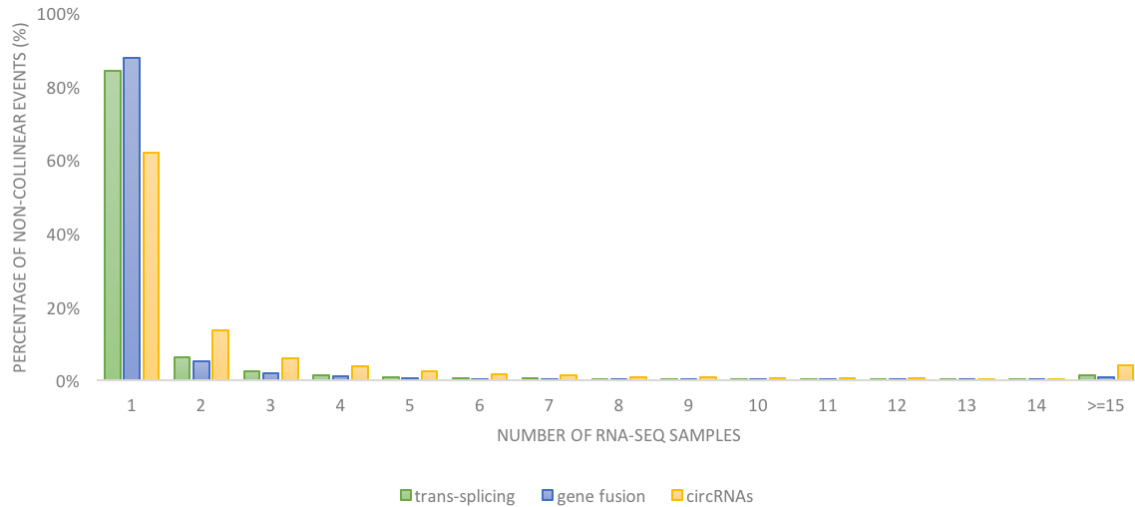

186

187 Supplemental Figure S10. Distribution of non-co-linear (NCL) events across *across 10641*  
 188 *samples.* .

189 Reads arising from trans-splicing, gene fusion and circRNA events are captured by a  
 190 TopHat-Fusion and CIRCexplorer2 tools. Trans-splicing events are identified from reads  
 191 that are spliced distantly on the same chromosome. Gene fusion events are identified from  
 192 reads spliced across different chromosomes. CircRNAs are identified from reads spliced in  
 193 a head-to-tail configuration.

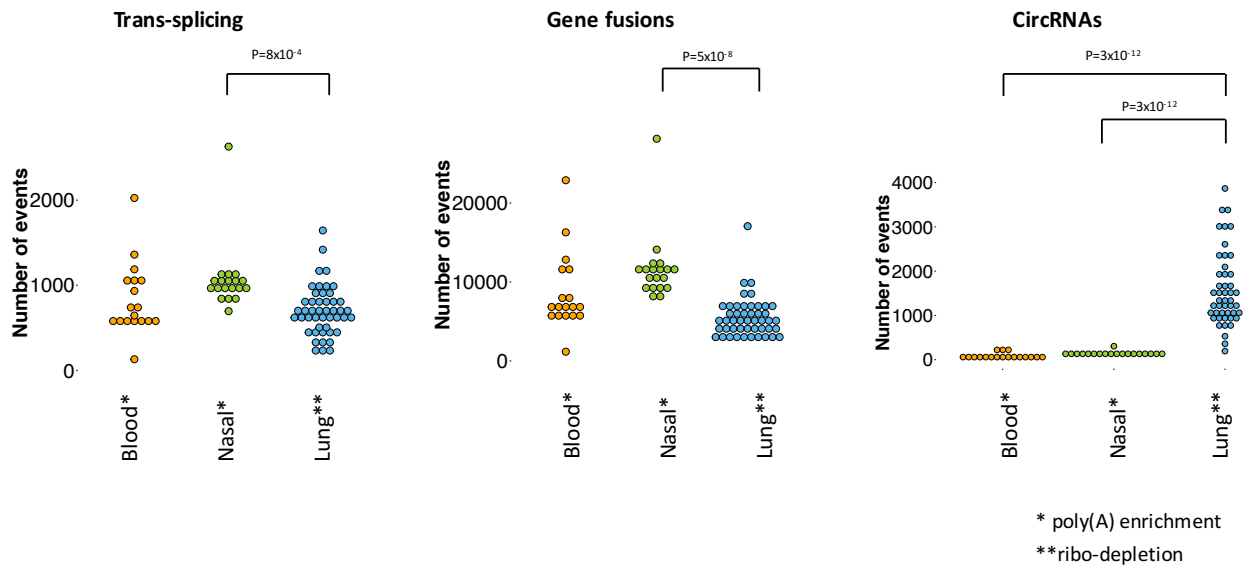

194

195 Supplemental Figure S11. Number of NCL events across in-house tissues and library  
 196 preparation protocols.

197 NCL events per sample are detected by TopHat-Fusion and CIRCexplorer tools. Samples  
 198 were prepared with poly(A) selection (whole blood and nasal epithelium) and ribo-  
 199 depletion (lung epithelium) protocols. Trans-splicing events are identified from reads  
 200 spliced distantly on the same chromosome. Gene fusion events are identified from reads  
 201 spliced across different chromosomes.

202

203

204

205

206

207

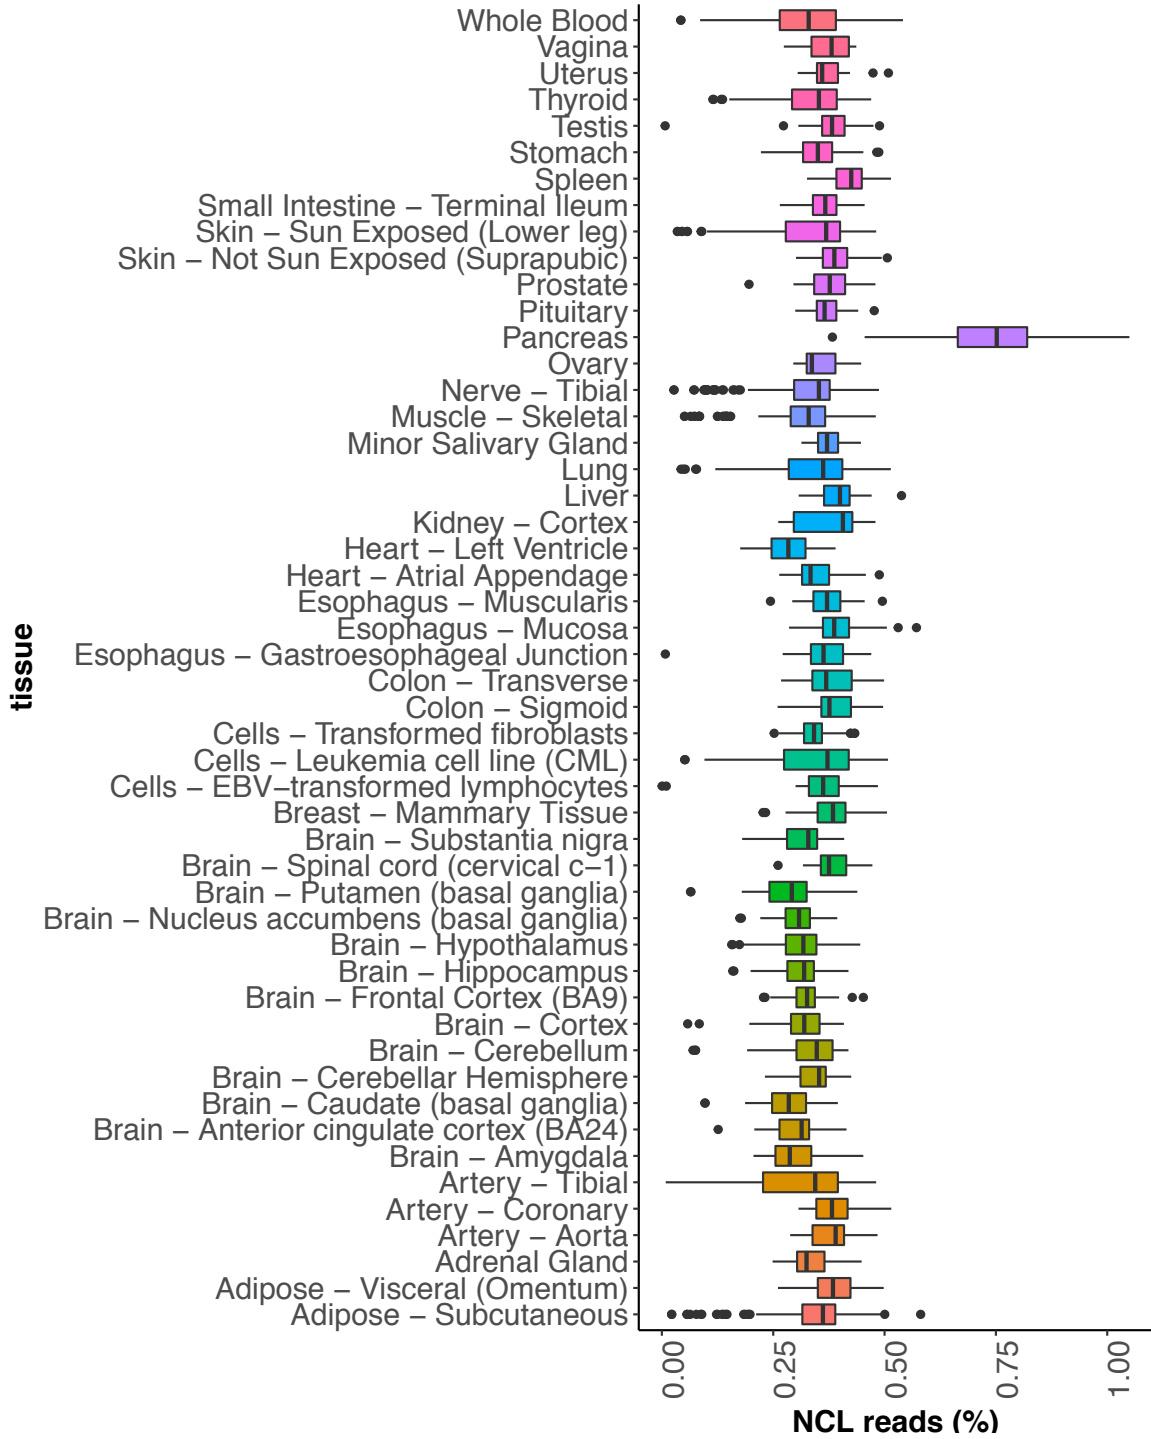

208

209

210

211

212 Supplemental Figure S12. Percentage of NCL reads across GTEx tissues (n=54). Percentages  
213 are calculated from the total number of reads. Reads arising from trans-splicing, gene  
214 fusion and circRNA events are captured by a TopHat-Fusion and CIRCexplorer2 tools and  
215 reported a NCL reads.

216

217

218

219

220

221

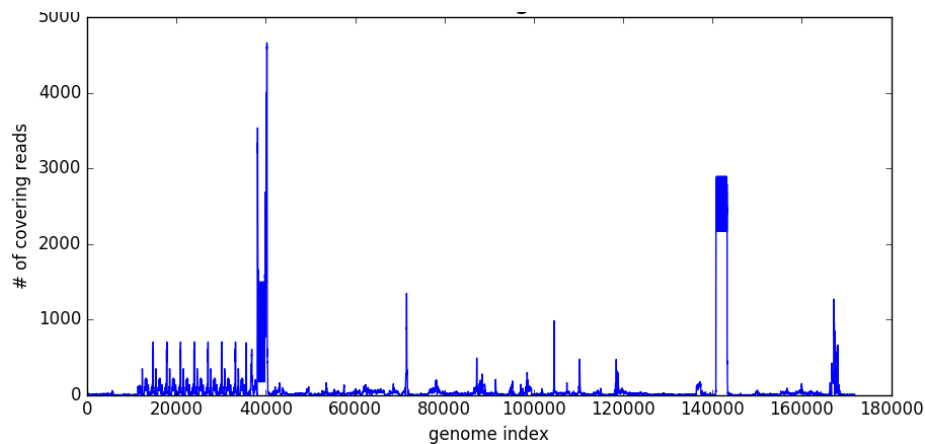

222

223 *Supplemental Figure S13. An example of coverage plot of EBV virus. Viral reads were*  
224 *obtained by ROP protocol from GTEx RNA-Seq sample of EBV-transformed lymphoblastoid*  
225 *cell lines (LCLs).*

226

227

228

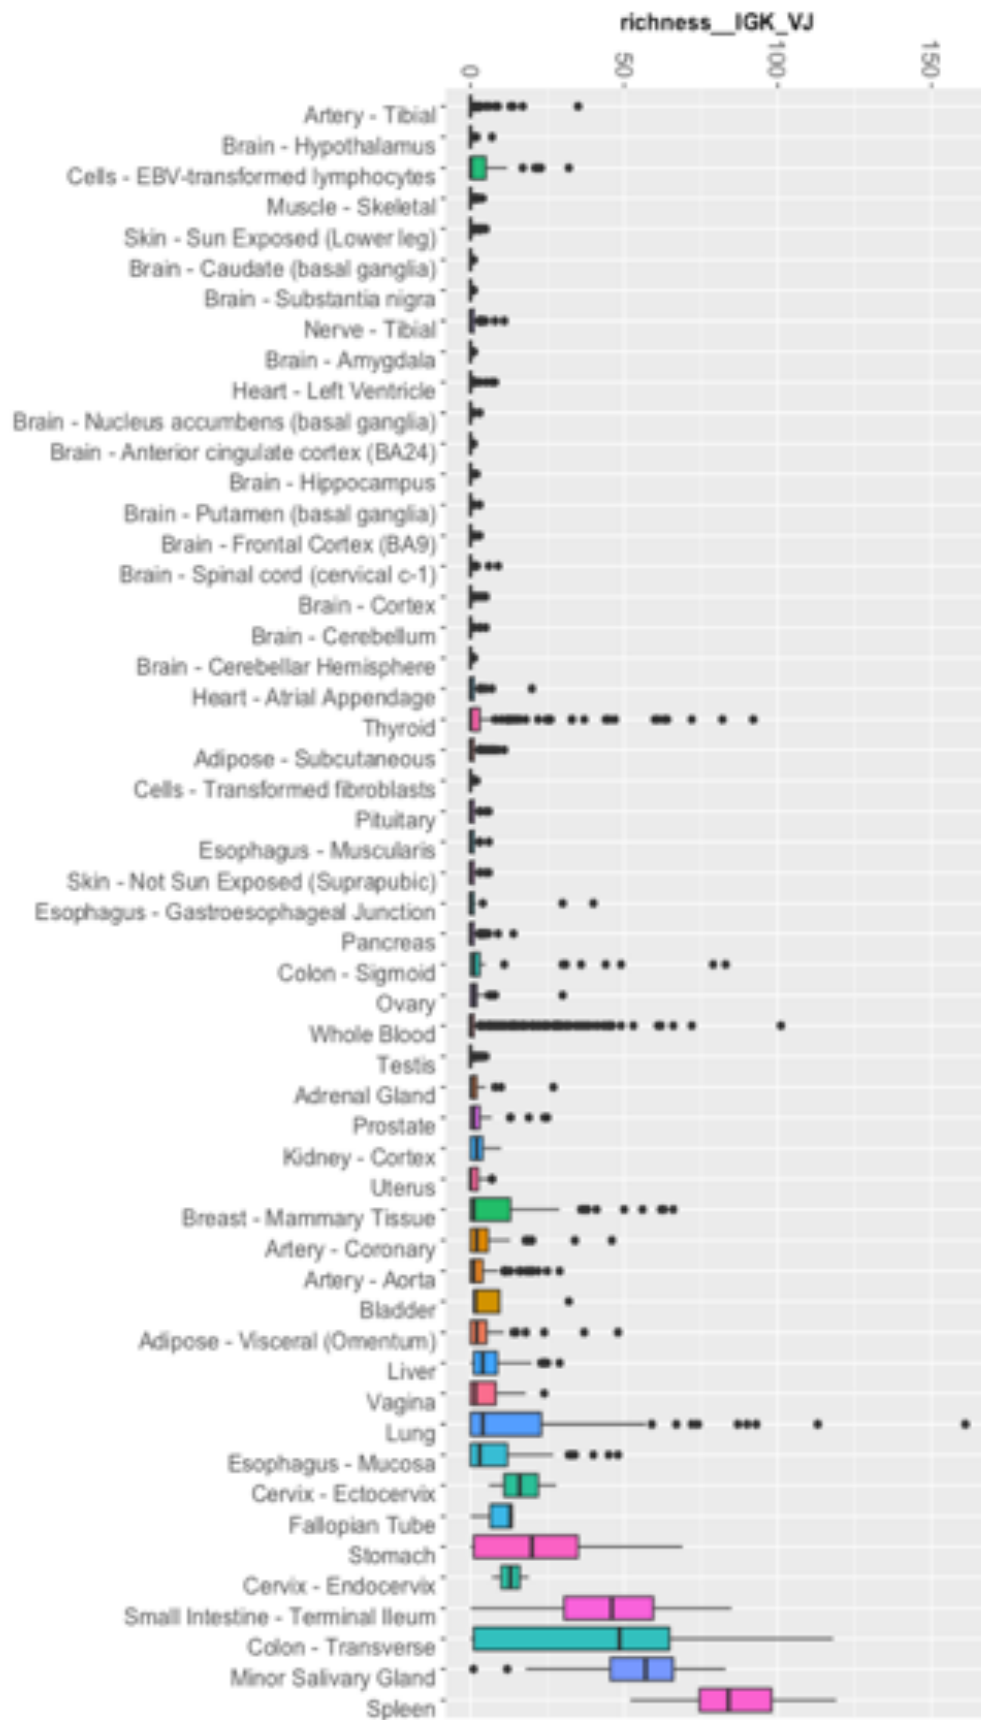

230 *Supplemental Figure S14. Number of VJ recombinations across GTEx human tissues for IGK*  
231 *chain.*

232

233

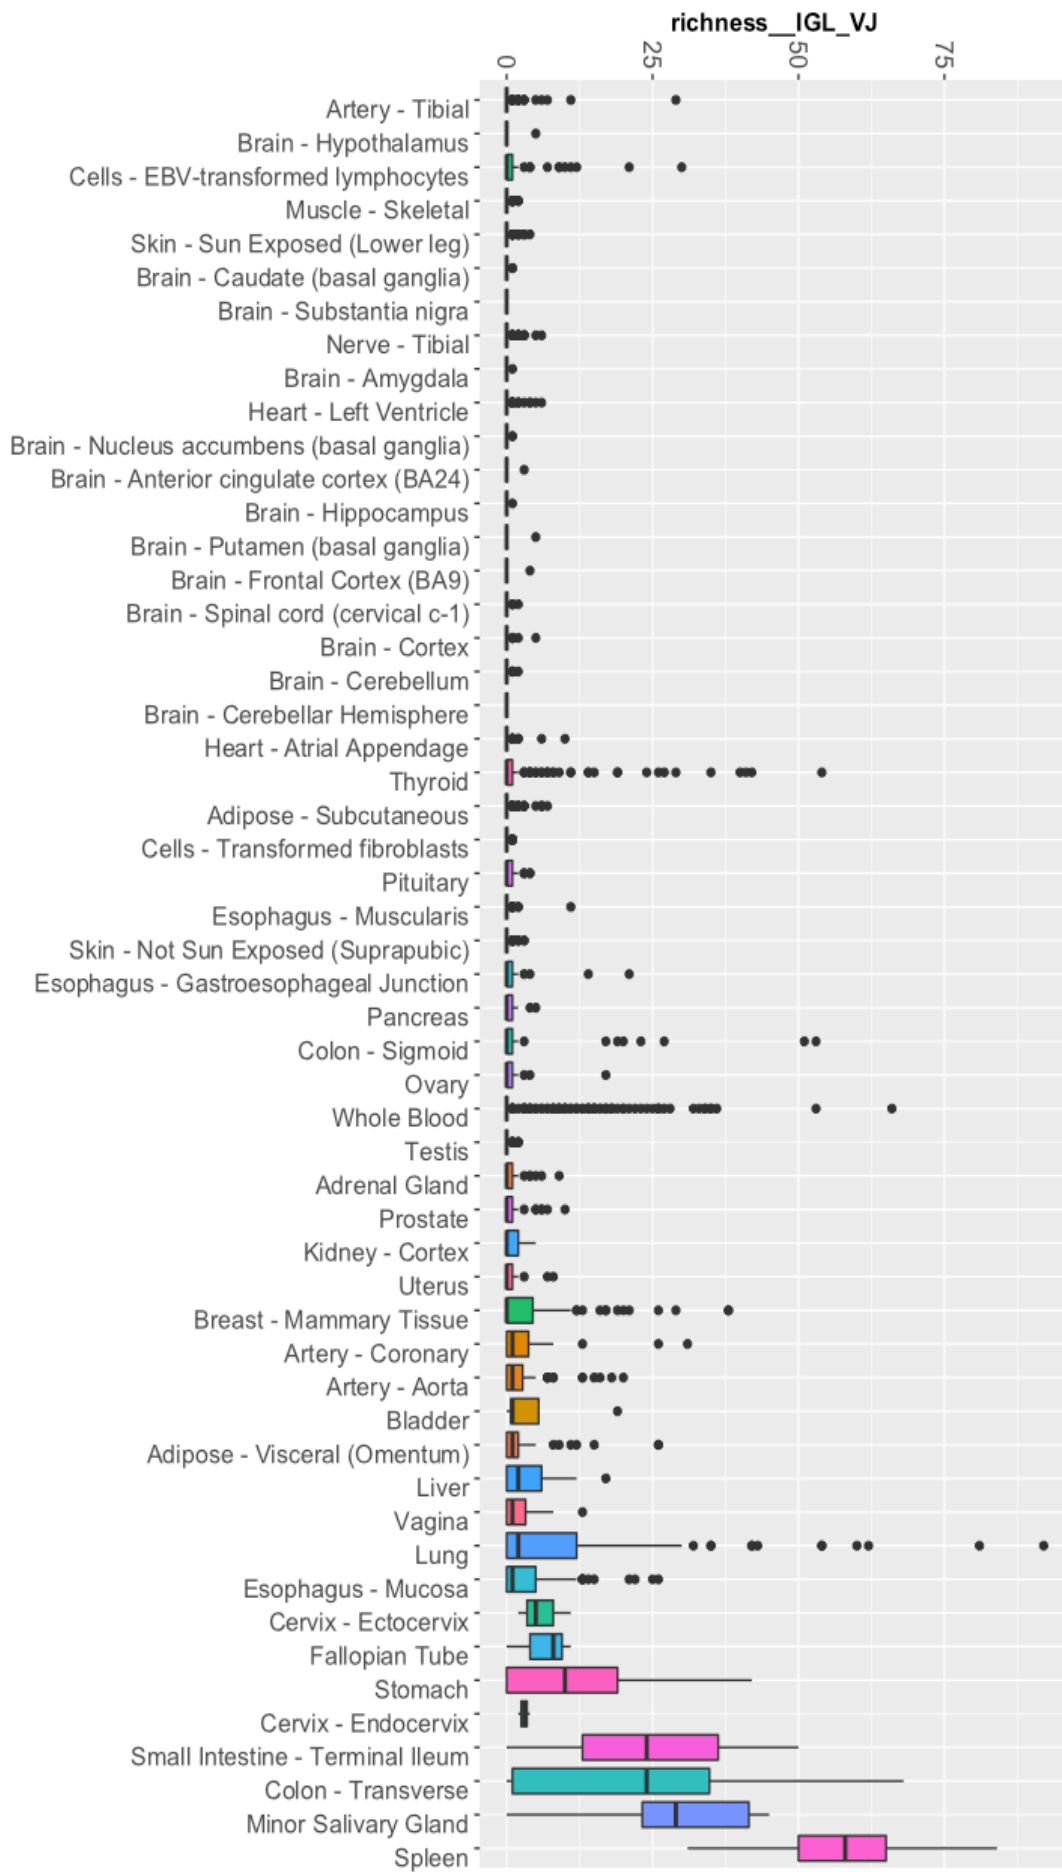



235 *Supplemental Figure S15. Number of VJ recombinations across GTEx human tissues for IGL*  
236 *chain.*

237

238

239

240

241

242

243

244

245

246

247

248

249

250

251

252

253

254

255

256

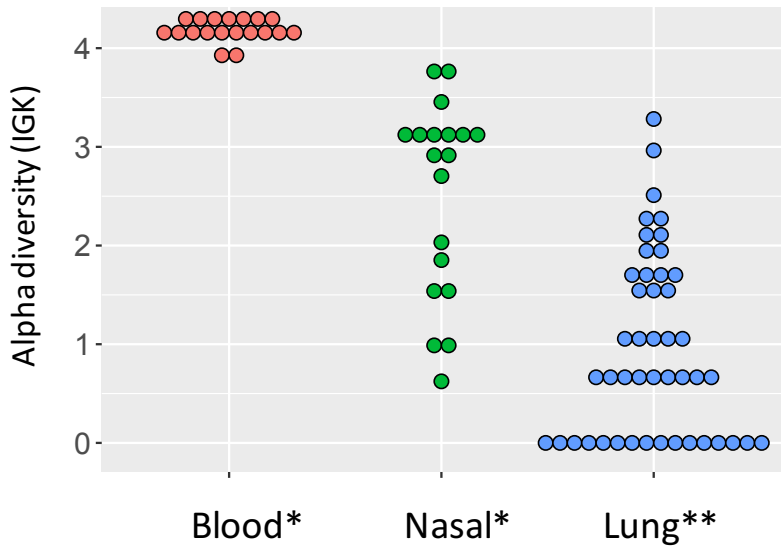

\* poly(A) enrichment  
 \*\*ribo-depletion

257

258 Supplemental Figure S16. Combinatorial diversity of immunoglobulin kappa locus (IGK)  
 259 locus across in-house tissues.

260 Samples were prepared by poly(A) selection (whole blood and nasal epithelium) and ribo-  
 261 depletion (lung epithelium) protocols. The combinatorial diversity of IGK locus is  
 262 determined based on the recombinations of the VJ gene segments. Shannon entropy  
 263 measures the alpha diversity by incorporating the total number of VJ combinations and  
 264 their relative proportions. Mean alpha diversity for blood samples was 4.2, for nasal  
 265 samples, was 2.5, and for lung, was 1.0.

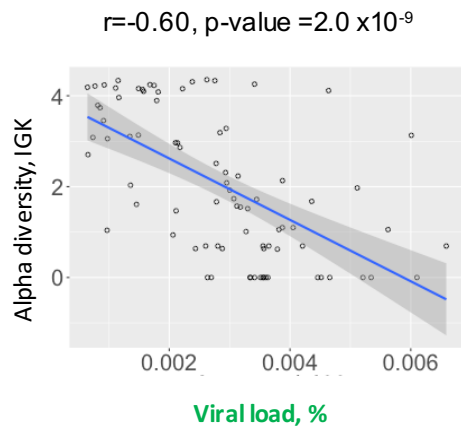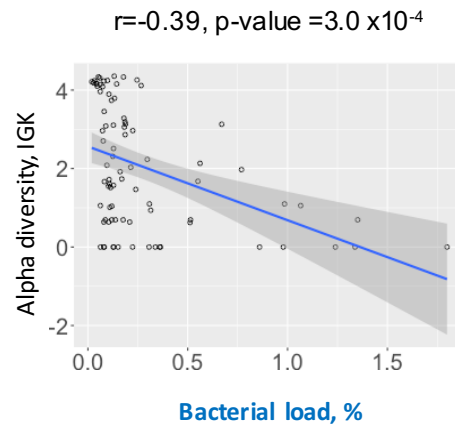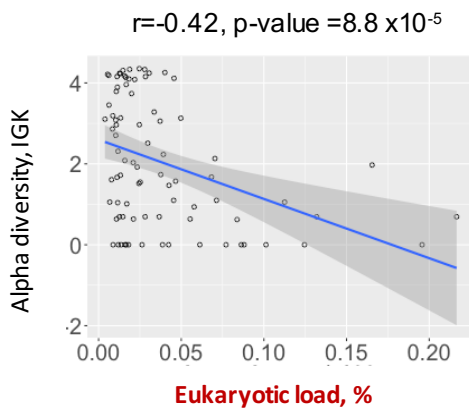

266

267 **Supplemental Figure S17. Association between microbial load and immune diversity.**

268 (a) Scatterplot of the viral load and combinatorial immune diversity of IGK locus. Pearson

269 correlation coefficient ( $r$ ) and  $p$ -value are reported. (b) Scatterplot of the eukaryotic load

270 and combinatorial immune diversity of IGK locus. Pearson correlation coefficient ( $r$ ) and  $p$

271 -value are reported. (c) Scatterplot of the bacterial load and combinatorial immune

272 diversity of IGK locus. Pearson correlation coefficient ( $r$ ) and  $p$ -value are reported.

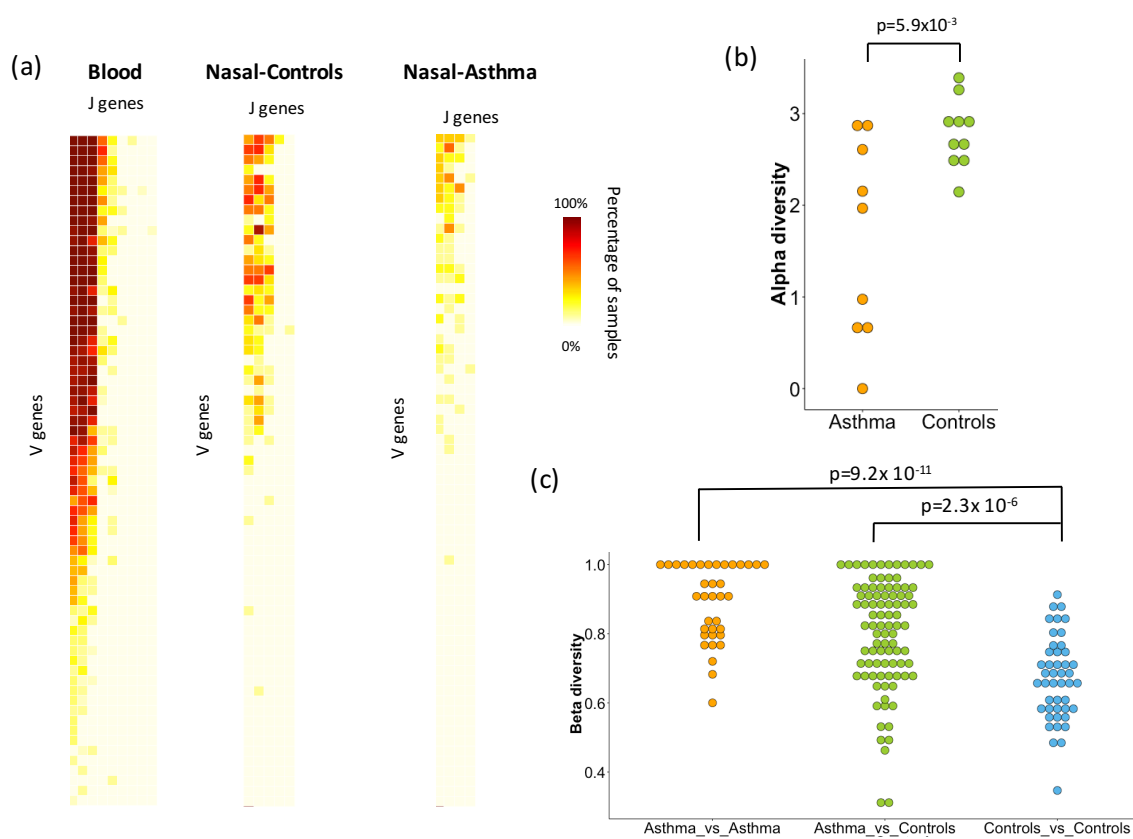

273

274 Supplemental Figure S18. Combinatorial diversity of immunoglobulin lambda locus (IGL)  
 275 locus differentiates disease status.

276 (a) Heat map depicting the percentage of RNA-Seq samples supporting particular VJ  
 277 combination for whole blood, nasal epithelium of healthy controls and asthmatic  
 278 individuals. Each row corresponds to a V gene and each column corresponds to a J gene.  
 279 (b) Alpha diversity is measured using the Shannon entropy incorporating the total number  
 280 of VJ combinations and their relative proportions. Nasal epithelium of asthmatic  
 281 individuals exhibits decreased combinatorial diversity of IGL compared to that of  
 282 healthy controls ( $p$ -value= $5.9 \times 10^{-3}$ ) (c) Compositional similarities between the samples in  
 283 terms of gain or loss of VJ combinations of IGL are measured using the Sørensen–

284 Dice index across pairs of samples from the same group (Asthma, Controls) and pairs of  
 285 sample from different groups (Asthma versus Controls). Lower level of similarity is  
 286 observed between nasal samples of the asthmatic individuals compared to the unaffected  
 287 controls (p-value $<9.2 \times 10^{-11}$ ). Nasal samples of the unaffected controls are more similar  
 288 to each other than to the asthmatic individuals (p-value $<2.3 \times 10^{-6}$ ).

289  
 290  
 291  
 292

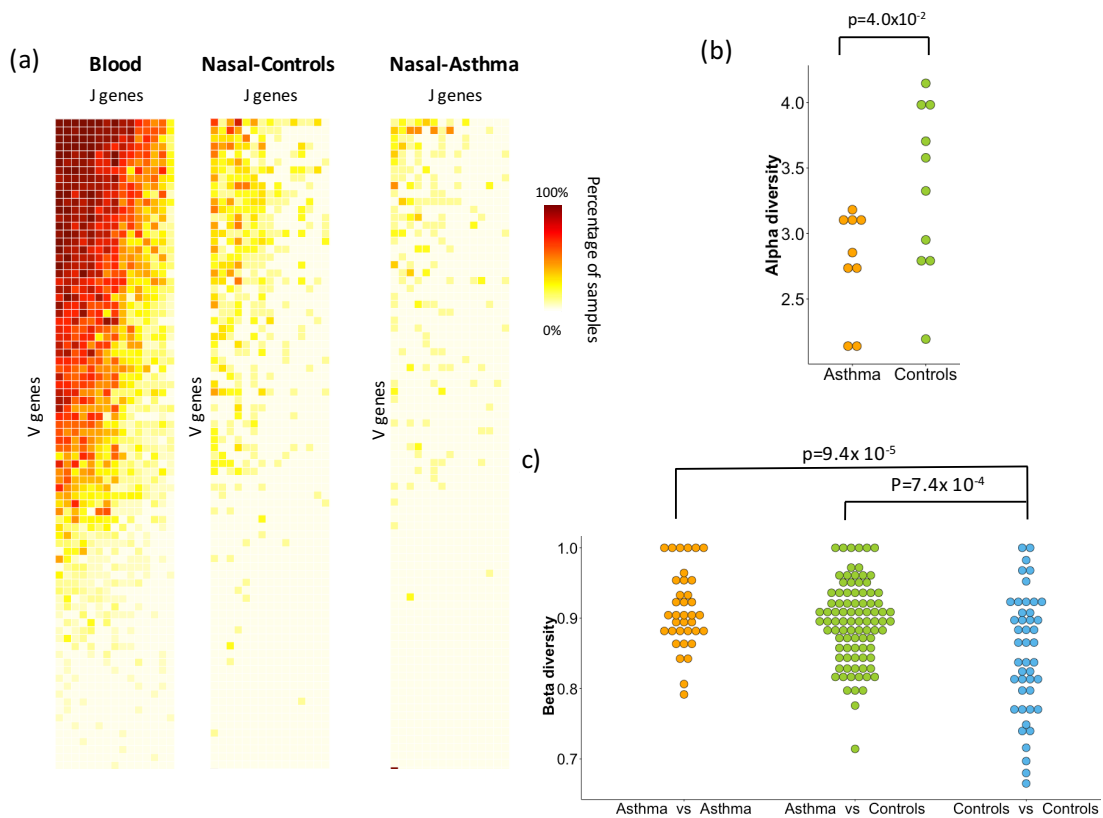

293

294 Supplemental Figure S19. Combinatorial diversity of T cell receptor beta (TCRB) locus  
295 differentiates disease status.

296 (a) Heat map depicting the percentage of RNA-Seq samples supporting of particular VJ  
297 combination for whole blood, nasal epithelium of healthy controls and of asthmatic  
298 individuals. Each row corresponds to a V gene and each column corresponds to a J gene.

299 (b) Alpha diversity is measured using the Shannon entropy incorporating the total number  
300 of VJ combinations and their relative proportions. The nasal epithelium of asthmatic  
301 individuals exhibits a decrease in combinatorial diversity of IGK locus compared to that of  
302 healthy controls ( $p\text{-value} = 4.0 \times 10^{-2}$ ) (c) Compositional similarities between the samples  
303 in terms of gain or loss of VJ combinations of IGK locus are measured using the Sørensen–  
304 Dice index across pairs of sample from the same group (Asthma, Controls) and pairs of  
305 sample from different groups (Asthma versus Controls). Lower level of similarity is  
306 observed between nasal samples of asthmatic individuals compared to unaffected controls  
307 ( $p\text{-value} < 9.4 \times 10^{-5}$ ). Nasal samples of unaffected controls are more similar to each other  
308 than to the asthmatic individuals ( $p\text{-value} < 7.4 \times 10^{-4}$ ).

309

310

311

312

313

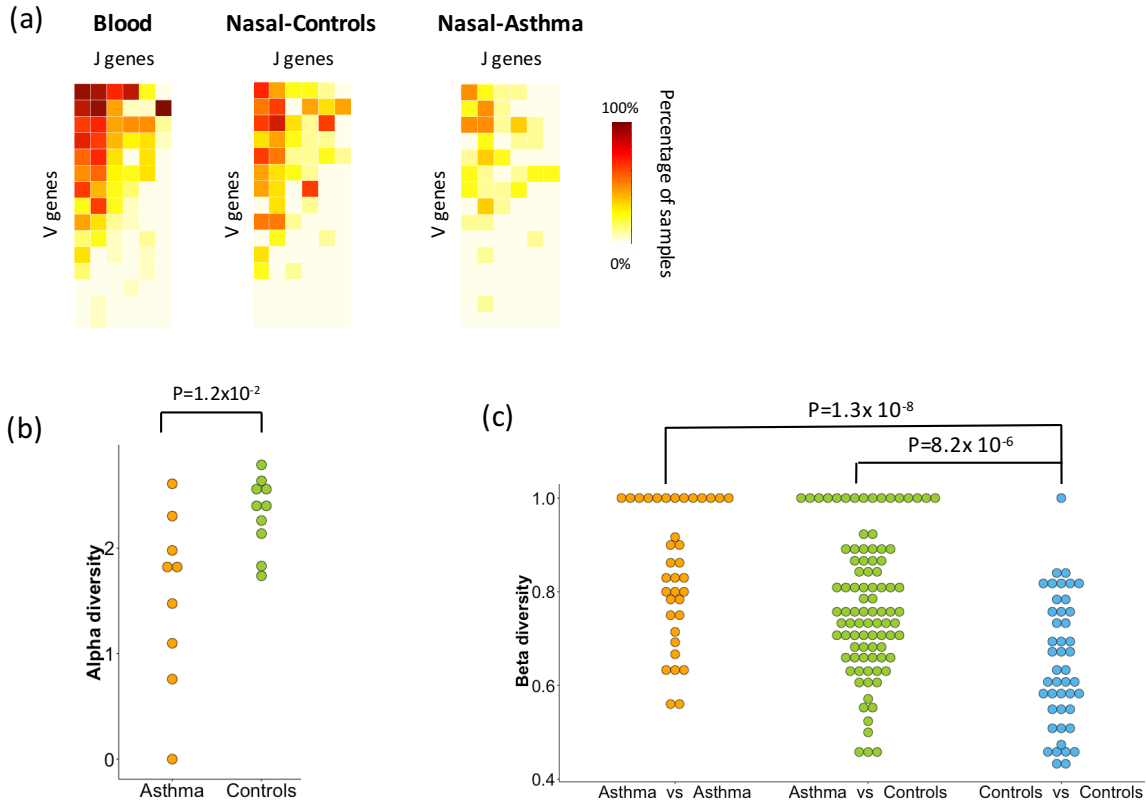

314

315 Supplemental Figure S20. Combinatorial diversity of T cell receptor gamma (TCRG) locus  
 316 differentiates disease status.

317 (a) Heat map depicting the percentage of RNA-Seq samples supporting of a particular VJ  
 318 combination for whole blood, nasal epithelium of healthy controls and asthmatic  
 319 individuals. Each row corresponds to a V gene and each column corresponds to a J gene.

320 (b) Alpha diversity is measured using the Shannon entropy incorporating the total number  
 321 of VJ combinations and their relative proportions. Nasal epithelium of asthmatic  
 322 individuals exhibits decreased combinatorial diversity of IGK locus compared to that of  
 323 healthy controls (p-value =  $1.2 \times 10^{-2}$ , ANOVA).

324 (c) Compositional similarities between the samples in terms of gain or loss of VJ combinations of IGK locus are measured using the

325 Sørensen–Dice index across pairs of sample from the same group (Asthma, Controls) and  
326 pairs of sample from different groups (Asthma versus Controls). Lower level of similarity is  
327 observed between nasal samples of asthmatic individuals compared to unaffected controls  
328 ( $p$ -value  $< 1.3 \times 10^{-8}$ ),. Nasal samples of unaffected controls are more similar to each other  
329 than to the asthmatic individuals ( $p$ -value  $< 8.2 \times 10^{-6}$ ).

330

331

332

333

334

335

336

337

338

339

340



341 *Supplemental Tables*

342 ***Supplemental Table S1. RNA-Seq datasets overview.*** in-house RNA-Seq data (n=86)  
 343 from the peripheral blood, nasal, and large airway epithelium of asthmatic and control  
 344 individuals (S1); (2) multi-tissue RNA-Seq data from Genotype-Tissue Expression (GTEx v6)  
 345 from 53 human body sites (Consortium & others, 2015) (n=8555) (S2); (3) randomly  
 346 selected RNA-Seq samples from the Sequence Read Archive (SRA) (n=2000) (S3). Unless  
 347 otherwise noted, we reported percentage of reads averaged across 3 datasets. For  
 348 counting purposes, the pairing information of the reads is disregarded, and each read from  
 349 a pair is counted separately.

350

351

352

| <i>Datasets</i>                                            | S1    | S2    | S3       |
|------------------------------------------------------------|-------|-------|----------|
| <i>Number of samples</i>                                   | 87    | 8555  | 1000     |
| <i>Read length</i>                                         | 100bp | 76bp  | 25-100bp |
| <i>Average number of reads per sample, (million reads)</i> | 88.8  | 54.6  | 90.2     |
| <i>Percentage of mapped reads (%)</i>                      | 83.8% | 88.2% | 77.2%    |

353

354

355

356

357

358 **Supplemental Table S2. Genomic profile of unmapped reads reported for each dataset (S1,**

359 **S2, S3).** Percentage of unmapped reads for each category is calculated as a fraction from

360 the total number of reads. Bars of the plot are not scaled. Human reads (black color)

361 mapped to reference genome and transcriptome via TopHat2. (a) Low quality/low-

362 complexity (light brown) and reads matching rRNA repeating unit (dark brown) were

363 excluded. (b) Hyper-edited reads are captured by hyper-editing pipeline proposed in

364 (Porath et al., 2014). (c) ROP identifies lost human reads (red color) from unmapped reads

365 using a more sensitive alignment. (d) ROP identifies lost repeat sequences (green color) by

366 mapping unmapped reads onto the reference repeat sequences. (e) Reads arising from

367 trans-splicing, gene fusion and circRNA events (orange color) are captured by a TopHat-

368 Fusion and CIRCexplorer2 tools. (f) IgBlast is used to identify reads spanning B and T cell

369 receptor gene rearrangement in the variable domain (V(D)J recombinations) (violet color).

370 (g) Microbial reads (blue color) are captured by mapping the reads onto the microbial

371 reference genomes.

372

373

374

375

376

377

378

|                             | S1    | S2    | S3    | Averaged across 3 datasets |
|-----------------------------|-------|-------|-------|----------------------------|
| <i>Mapped</i>               | 83.2% | 88.2% | 77.2% | 82.9%                      |
| <i>Unmapped</i>             | 17%   | 11.8% | 23%   | 17.1%                      |
| <i>Low quality reads</i>    | 4.8%  | 7.0%  | 9%    | 7.0%                       |
| <i>rRNA repeat</i>          | 3.8%  | 0.1%  | 3%    | 2.4%                       |
| <i>Lost human reads</i>     | 6.0%  | 3.7%  | 8%    | 5.7%                       |
| <i>Hyper-edited reads</i>   | 0.02% | 0.1%  | 0.1%  | 0.1%                       |
| <i>Lost repeat reads</i>    | 0.3%  | 0.1%  | 0.1%  | 0.2%                       |
| <i>NCL RNA</i>              | 0.3%  | 0.3%  | 0.4%  | 0.3%                       |
| <i>V(D)J recombinations</i> | 0.01% | 0.03% | 0.01% | 0.02%                      |
| <i>Microbial reads</i>      | 1.5%  | 0.5%  | 2.3%  | 1.4%                       |
| <i>Unaccounted reads</i>    | 0.18% | 0.09% | 0.10% | 0.12%                      |

379









384 Supplemental Table S3. Relative genomic abundance of microbial taxa at different levels  
 385 of taxonomic classification after removal of reads with human origin (average over all  
 386 samples of tissues).  
 387 Taxonomic classification is performed using MetaPhlan2, which is able to assign the  
 388 filtered unmapped reads to the microbial marker genes.

| <b>Tissue</b>              | <b>Whole blood</b> | <b>Nasal epithelium</b> | <b>Lung epithelium</b> |
|----------------------------|--------------------|-------------------------|------------------------|
| N                          | 19                 | 19                      | 49                     |
| Library preparation method | poly(A) enrichment | poly(A) enrichment      | ribo-depletion         |
| <b>Phylum</b>              |                    |                         |                        |
| Proteobacteria             | 0.0%               | 0.9%                    | 100.0%                 |
| Actinobacteria             | 0.0%               | 99.1%                   | 0.0%                   |
| <b>Class</b>               |                    |                         |                        |
| Betaproteobacteria         | 0.0%               | 0.5%                    | 86.7%                  |
| Gammaproteobacteria        | 0.0%               | 0.5%                    | 13.3%                  |
| Actinobacteria             | 0.0%               | 98.9%                   | 0.0%                   |
| <b>Order</b>               |                    |                         |                        |
| Burkholderiales            | 0.0%               | 0.0%                    | 87.0%                  |
| Enterobacteriales          | 0.0%               | 0.0%                    | 12.0%                  |
| Actinomycetales            | 0.0%               | 99.5%                   | 0.0%                   |
| Pseudomonadales            | 0.0%               | 0.5%                    | 1.0%                   |

389



390 **Supplementary Table S4. Parameters for each RNA-Seq aligner for default, sensitive, and**  
 391 **very sensitive settings.**

392 Sensitive setting has more relaxed parameters for filtering.

|        | Default                                                                               | Sensitive                                                                            | Very Sensitive                                                                                           |
|--------|---------------------------------------------------------------------------------------|--------------------------------------------------------------------------------------|----------------------------------------------------------------------------------------------------------|
| Tophat | -D 10 -R 2 -N 0 -L 22 -i<br>S,0,2.50                                                  | -D 15 -R 2 -L 22 -i<br>S,1,1.15                                                      | -D 20 -R 3 -N 0 -L 20 -i<br>S,1,0.50                                                                     |
| STAR   | --<br>seedNoneLociPerWindow 10 --<br>outFilterMismatchNmax 10 -- seedPerReadNmax 1000 | --<br>seedNoneLociPerWindow 15 --<br>outFilterMismatchNmax 15 --seedPerReadNmax 1500 | --<br>seedNoneLociPerWindow 15 --<br>outFilterMismatchNmax 15 --seedPerReadNmax 1500 --twopassMode Basic |

393

394 **Supplementary Table S5. Average mapping rate for different aligners with different**  
 395 **mapping settings.**

396 The average rate is noted, and the standard deviation is noted within parenthesis.

|        | Default/Fast  | Sensitive     | Very Sensitive |
|--------|---------------|---------------|----------------|
| Tophat | 89.06% (3.84) | 89.22% (3.51) | 89.18% (3.62)  |
| STAR   | 80.86% (9.22) | 81.70% (9.25) | 81.74% (9.35)  |

397

398 *Supplemental Methods*

399 In-house RNA-Seq data

400 Subject Recruitment

401 **Poly(A) selected RNA-Seq samples (n=38).** In this analysis, we used a subset of Puerto Rican  
402 Islanders recruited as part of the on-going Genes-environments & Admixture in Latino  
403 Americans study (GALA II) (Anders, Pyl, & Huber, 2014; Jin, Tam, Paniagua, & Hammell,  
404 2015; Melé et al., 2015; Tarailo-Graovac & Chen, 2009). We classified asthma by physician  
405 diagnosis and the presence of at least two symptoms (wheezing, coughing, or shortness of  
406 breath) during 2 years prior to the enrollment. All study subjects had no history of smoking  
407 or recent (within 4 weeks of recruitment) nasal steroid use. The study was approved by  
408 local institutional review boards, and written assent/consent was received from all subjects  
409 and, if applicable, parents of subjects under the age of legal consent.

410 **Ribo-Zero RNA-Seq samples (n=49).** Via community-based advertising, we recruited adults  
411 aged 18-70 years to participate in a study, in which they underwent research  
412 bronchoscopy. The study was approved by the University of California at San Francisco  
413 Committee on Human Research. Written informed consent was obtained from all subjects,  
414 and all studies were performed in accordance with the principles expressed in the  
415 Declaration of Helsinki.

416

417 Sample Collection

418 **Poly(A) selected RNA-Seq samples (n=38).** Methods for nasal epithelial cell collection and  
419 processing are described in Poole et al. (Tarailo-Graovac & Chen, 2009). Briefly, nasal  
420 epithelial cells were collected from behind the inferior turbinate with a cytology brush  
421 using a nasal illuminator. The collected brush was submerged in a mixture of RLT Plus lysis  
422 buffer and beta-mercaptoethanol, and frozen at -80 C until extraction was performed with  
423 a Qiagen Allprep RNA/DNA extraction kit (Qiagen, Valencia, CA). We collected 10ml of  
424 whole blood using PAXgene RNA blood tubes (PreAnalytiX, Valencia, CA) and isolated RNA  
425 using PAXgene RNA blood extraction kits, according to the manufacturers' protocol.  
426 Portions of the nasal airway epithelial whole transcriptome data were published in a  
427 previous manuscript (Tarailo-Graovac & Chen, 2009).

428 **Ribo-Zero RNA-Seq samples (n=49).** During bronchoscopy airway epithelial brushings,  
429 samples were obtained from 3<sup>rd</sup>-4<sup>th</sup> generation bronchi. RNA was extracted from the  
430 epithelial brushing samples using the Qiagen RNeasy mini-kit (Qiagen, Valencia, CA),  
431 according to manufacturer's protocol.

432

433 Whole Transcriptome Sequencing

434 **Poly(A) selected RNA-Seq samples (n=38).** We constructed Poly-A RNA-seq libraries using  
435 500 ng of blood and nasal airway epithelial total RNA from 9 atopic asthmatics and 10 non-  
436 atopic controls. Libraries were constructed and barcoded with the Illumina TruSeq RNA  
437 Sample Preparation v2 protocol. Barcoded nasal airway RNA-seq libraries from each of the  
438 19 subjects were pooled and sequenced as 2 x 100bp paired-end reads across two flow

439 cells of an Illumina HiSeq 2000. Barcoded blood RNA-seq libraries from each of the 19  
440 subjects were pooled and sequenced as 2 x 100bp paired end reads across 4 lanes of an  
441 Illumina HiSeq 2000 flow cell.

442 **Ribo-Zero RNA-Seq samples (n=49).** We used 100ng of isolated RNA from a total of 61  
443 samples to construct ribo-depleted RNA-seq libraries using the TruSeq Stranded Total RNA  
444 with Ribo-Zero Human/Mouse/Rat library preparation kit, per manufacturer's protocol.  
445 Barcoded bronchial epithelial RNA-seq libraries were multiplexed and sequenced as 2 x  
446 100bp paired end reads on an Illumina HiSeq 2500. On average, 37 million reads were  
447 generated per sample. We excluded 12 samples from further analyses due to high  
448 ribosomal RNA read counts (library preparation failure), leaving a total of 49 samples  
449 suitable for further analyses.

450

#### 451 GTEX RNA-Seq data

452 We used RNA-Sequencing data from Genotype-Tissue Expression study (GTEx Consortium  
453 v.6) corresponding to 8,555 samples collected from 544 individuals from 53 tissues  
454 obtained from Genotype-Tissue Expression study (GTEx v6). RNA-Seq data is from Illumina  
455 HiSeq sequencing of 75 bp paired-end reads. The data was derived from 38 solid organ  
456 tissues, 11 brain subregions, whole blood, and three cell lines of postmortem donors. The  
457 collected samples are from adults matched for age across males and females. We  
458 downloaded the mapped and unmapped reads in BAM format from dbGap  
459 (<http://www.ncbi.nlm.nih.gov/gap>).

460

## 461 SRA RNA-Seq data

462

463 Samples (n=2000) were randomly selected using SQLite database from R/Bioconductor  
464 package SRAdb (<https://bioconductor.org/packages/release/bioc/html/SRAdb.html>). We  
465 have used a script from  
466 [https://github.com/nellore/runs/blob/master/sra/define\\_and\\_get\\_fields\\_SRA.R](https://github.com/nellore/runs/blob/master/sra/define_and_get_fields_SRA.R) to select  
467 run\_accessions from the sra table with platform = 'ILLUMINA', library\_strategy = 'RNA-  
468 Seq', and taxon\_id = 9606 (human).

469

## 470 Workflow to categorize the mapped reads

### 471 *Map reads onto human genome and transcriptome*

472 We mapped reads onto the human transcriptome (Ensembl GRCh37) and genome  
473 reference (Ensembl hg19) using tophat2 (v 2.0.13) with the default parameters. Tophat2  
474 was supplied with a set of known transcripts (as a GTF formatted file, Ensembl GRCh37)  
475 using -G option. The mapped reads of each sample are stored in a binary format (.bam).

476

### 477 *Categorize mapped reads into genomic categories*

478 ROP categorizes the reads into genomic categories based on the compatibility of each read  
479 from the pair with the features defined by Ensembl (GRCh37) gene annotations. First, we  
480 determined CDS, UTR3, UTR5 coordinates. We downloaded annotations for CDS, UTR3,  
481 UTR5 from UCSC Genome Browser (<http://genome.ucsc.edu/cgi-bin/hgTables>) in BED

482 (browser extensible data) format. Next, we used gene annotations (a GTF formatted file,  
483 Ensembl GRCh37) to determine intron coordinates and inter-genic regions. We defined  
484 two types of inter-genic regions: '(proximate) inter-genic' region (1Kb from the gene  
485 boundaries) and 'deep inter-genic' (beyond a proximity of 1Kb from the gene boundaries).

486

487 Next, we checked the compatibility of the mapped reads with the defined genomic  
488 features, as follows:

489

490 a. Read mapped to multiple locations on the reference genome is categorized  
491 as a multi-mapped read.

492 b. Read fully contained within the CDS, intron, UTR3, or UTR5 boundaries of a  
493 least one transcript is classified as a CDS, intronic, UTR3, or UTR5,  
494 respectively.

495 c. Read simultaneously overlapping UTR3 and UTR5 regions is classified as a  
496 UTR read.

497 d. Read spanning exon-exon boundary is defined as a junction read.

498 e. Read mapped outside of gene boundaries and within a proximity of 1Kb is  
499 defined as a (proximal) inter-genic read.

500 f. Read mapped outside of gene boundaries and beyond the proximity of 1Kb  
501 is defined as a deep inter-genic read.

502 g. Read mapped to mitochondrial DNA (MT tag in hg19) is classified as a  
503 mitochondrial read.

504 h. Reads from a pair mapped to different chromosomes are classified as a  
505 fusion read.

506 Scripts to categorize mapped reads into genomic categories are distributed with ROP  
507 protocol.

508

### 509 *Categorize mapped reads overlapping repeat instances*

510 Mapped reads were categorized based on the overlap with the repeat instances defined  
511 by RepeatMasker annotation (Repeatmasker v3.3, Repeat Library 20120124).  
512 RepeatMasker masks the repeats using the RepBase library:  
513 (<http://www.girinst.org/rebase/update/index.html>), which contains prototypic  
514 sequences representing repetitive DNA from different eukaryotic species. We use GTF files  
515 generated from the RepeatMasker annotations by Jin, Ying, et al. (Jin et al., 2015) and  
516 downloaded from:

517 [http://labshare.cshl.edu/shares/mhammelllab/www-](http://labshare.cshl.edu/shares/mhammelllab/www-data/TEToolkit/TE_GTF/hg19_rmsk_TE.gtf.gz)  
518 [data/TEToolkit/TE\\_GTF/hg19\\_rmsk\\_TE.gtf.gz](http://labshare.cshl.edu/shares/mhammelllab/www-data/TEToolkit/TE_GTF/hg19_rmsk_TE.gtf.gz)

519

520 Following Melé, Marta, et al. (Melé et al., 2015), repeat elements overlapping CDS regions  
521 are excluded from the analysis. We filtered out 6,873 repeat elements overlapping CDS  
522 regions. Prepared repeat annotations (bed formatted file) are available at  
523 <https://drive.google.com/file/d/0Bx1fyWeQo3cORi1UNW9kYUk/view?pref=2&pli=>

524 [1](https://drive.google.com/file/d/0Bx1fyWeQo3cORi1UNW9kYUk/view?pref=2&pli=1)

525

526 The prepared repeat annotations contain 8 Classes and 43 Families. Number of elements  
 527 per family and class represented below (Supplemental Methods Table SM1):  
 528

| classID   | N       |
|-----------|---------|
| DNA       | 458223  |
| LINE      | 1478382 |
| LTR       | 707384  |
| RC        | 2226    |
| SVA       | 3582    |
| RNA       | 717     |
| Satellite | 8950    |
| SINE      | 1765403 |

529

530 **Supplemental Methods Table SM1. Number of repeat elements per class.** Repeat instances  
 531 are defined by RepeatMasker (RepeatMasker v3.3, Repeat Library 20120124) based on  
 532 RepBase library. RepBase library contains prototypic sequences representing repetitive  
 533 DNA from different eukaryotic species.

534

| familyID | n       |
|----------|---------|
| acro     | 44      |
| Alu      | 1173282 |



---

|               |        |
|---------------|--------|
| centr         | 2272   |
| CR1           | 60577  |
| Deu           | 1262   |
| DNA           | 4609   |
| Dong-R4       | 554    |
| ERV           | 579    |
| ERV1          | 172612 |
| ERVK          | 10446  |
| ERVL          | 159606 |
| ERVL-MaLR     | 343266 |
| Gypsy         | 18553  |
| hAT           | 15418  |
| hAT-Blackjack | 19578  |
| hAT-Charlie   | 251618 |
| hAT-Tip100    | 30204  |
| Helitron      | 2226   |
| L1            | 937636 |
| L2            | 461296 |
| LTR           | 2322   |
| Merlin        | 55     |
| MIR           | 589496 |
| MuDR          | 1978   |

---

|               |        |
|---------------|--------|
| Penelope      | 51     |
| PiggyBac      | 2352   |
| RNA           | 717    |
| RTE           | 17617  |
| RTE-BovB      | 651    |
| Satellite     | 6247   |
| SINE          | 1363   |
| SVA_A         | 257    |
| SVA_B         | 465    |
| SVA_C         | 279    |
| SVA_D         | 1358   |
| SVA_E         | 232    |
| SVA_F         | 991    |
| TcMar         | 5354   |
| TcMar-Mariner | 16253  |
| TcMar-Tc2     | 8098   |
| TcMar-Tigger  | 102706 |
| telo          | 387    |

535

536 **Supplemental Methods Table SM2. Number of repeat elements per family.** Repeat

537 instances are defined by RepeatMasker (RepeatMasker v3.3, Repeat Library 20120124)

538 based on RepBase library.

539

540 We determined the coordinates of repeat elements (*class\_id* and *family\_id* attributes from  
541 *the GTF file*) from the repeat annotations. Next, we checked the compatibility of the  
542 mapped reads with the repeat instances. We disregarded the pairing information for the  
543 unmapped reads and count each end as a separate read. Reads entirely mapped to the  
544 corresponding repeat instance are counted. Scripts to categorize mapped reads based on  
545 the overlap with the repeat instances are distributed with ROP protocol.

546

547 ***Categorize mapped reads overlapping B cell receptor (BCR) and T cell receptor (TCR) loci***

548 We used the gene annotations (Ensembl GRCh37) to extract BCR and TCR genes. We  
549 extracted gene annotations of the ‘constant’ (labeled as *IG\_C\_gene*, Ensembl GRCh37),  
550 ‘variable’ (labeled as *IG\_V\_gene*, Ensembl GRCh37), ‘diversity’ (labeled as *IG\_D\_gene*,  
551 Ensembl GRCh37), and ‘joining’ genes (labeled as *IG\_J\_gene*, Ensembl GRCh37) of BCR and  
552 TCR loci. We excluded the BCR and TCR pseudogenes (labeled as *IG\_C\_pseudogene*,  
553 *IG\_V\_pseudogene*, *IG\_D\_pseudogene*, *IG\_J\_pseudogene*, *TR\_C\_pseudogene*,  
554 *TR\_V\_pseudogene*, *TR\_D\_pseudogene*, and *TR\_J\_pseudogene*). In addition, we excluded  
555 the patch contigs *HG1592\_PATCH* and *HG7\_PATCH*, as they are not part of the Ensembl  
556 hg19 reference, and reads are not mapped on the patch contigs by high throughput  
557 aligners. After following the filtering steps described above, we extracted a total of 386  
558 immune genes: 207 BCR genes and 179 TCR genes. The gene annotations for antibody  
559 genes (GTF formatted file) are available at  
560 <https://drive.google.com/file/d/0Bx1fyWeQo3cObFZNT3kyQIZUS1E/view?pref=2&pli=1>

561

562 The number of VDJ genes per locus is reported in the Table 3.

563

|                  | C domain | V domain | D domain | J domain |
|------------------|----------|----------|----------|----------|
| <i>IGH</i> locus | 8        | 55       | 38       | 6        |
| <i>IGK</i> locus | 1        | 46       | -        | 5        |
| <i>IGL</i> locus | 4        | 37       | -        | 7        |
| TCRA locus       | 1        | 46       | -        | 57       |
| TCRB locus       | 1        | 39       | 0        | 8        |
| TRG locus        | 2        | 9        | -        | 5        |
| TRD locus        | 1        | 3        | 11       | 4        |

564

565 **Supplemental Methods Table SM3. The number of VDJ genes for each antibody chains.**

566 Antibody genes were extracted from the gene annotations (Ensembl GRCh37).

567

568 The list of the genes encoding the C region of the BCR and TCR chains is presented in

569 Supplemental Methods Table SM4.

570

| Name of the chain       | Genes encoding for the C region of the chain |
|-------------------------|----------------------------------------------|
| IG@ locus               |                                              |
| $\alpha$ heavy IG chain | IGHA1, IGHA2                                 |

|                  |                            |
|------------------|----------------------------|
| δ heavy IG chain | IGHD                       |
| γ heavy IG chain | IGHG1, IGHG2, IGHG3, IGHG4 |
| ε heavy IG chain | IGHE                       |
| μ heavy IG chain | IGHM                       |
| κ light IG chain | IGKC                       |
| λ light IG chain | IGLC1, IGLC2, IGLC3, IGLC7 |
| TCR@ locus       |                            |
| α TCR chain      | TRAC                       |
| β TCR chain      | TRBC2                      |
| γ TCR chain      | TRGC1, TRGC2               |
| δ TCR chain      | TRDC                       |

571

572 **Supplemental Methods Table SM4. List of the genes encoding the C region of the BCR and**  
573 **TCR chains.** Genes were extracted from the gene annotations (Ensembl GRCh37).

574

575 The number of reads mapping to each C-V-D-J genes was *obtained by counting the number*  
576 *of sequencing reads that align, with high confidence, to each of the genes (HTSeq v0.6.1)*  
577 *(Anders et al., 2014).* Script “htseq-count” is supplied with the gene annotations for BCR  
578 and TCR genes (genes\_Ensembl\_GRCh37\_BCR\_TCR.gtf) and a bam file. The bam file  
579 contains reads mapped to the human genome and transcriptome using tophat2 (See  
580 Section “*Map reads onto human genome and transcriptome*” for details). The script  
581 generates individual gene counts by examining the read compatibility with BCR and TCR

582 genes. We chose a conservative setting (--mode=intersection-strict) to handle reads  
583 overlapping more than one feature. Thus, a read overlapping several genes simultaneously  
584 is marked as a read with no feature and is excluded from the consideration.

585

### 586 *Workflow for categorizing the unmapped reads*

587 We first converted the unmapped reads saved by tophat2 from a BAM file into a FASTQ  
588 file (using bamtools). The FASTQ file of unmapped contain full read pairs (both ends of a  
589 read pair were unmapped) and discordant read pairs (one read end was mapped while the  
590 other end was unmapped). We disregarded the pairing information of the unmapped reads  
591 and categorize unmapped reads using the following steps:

592

#### 593 *A. Quality Control*

594 Low quality reads, defined as reads that have quality lower than 30 in at least 75% of their  
595 base pairs, were identified by FASTX (v 0.0.13). Low complexity reads, defined as reads  
596 with sequences of consecutive repetitive nucleotides, are identified by SEQCLEAN. As a  
597 part of the quality control, we also excluded unmapped reads mapped onto the rRNA  
598 repeat sequence (HSU13369 Human ribosomal DNA complete repeating unit) (BLAST+  
599 2.2.30). We prepared the index from rRNA repeat sequence using makeblastdb and  
600 makembindindex from BLAST+. We used the following command for makeblastdb:

601     ➤ makeblastdb -parse\_seqids -dbtype nucl -in <fasta file>.

602 We used the following command for makembindindex:

603     ➤ makembindindex -input <fasta file> -output <index> -ifformat blastdb

604

605 ***B. Mapping unmapped reads onto the human references.***

606 We remapped the unmapped reads to the human reference sequences using Megablast  
607 (BLAST+ 2.2.30). We mapped reads onto the following references:

- 608 • Reference transcriptome (known transcripts), Ensembl GRCh37
- 609 • Reference genome, hg19 Ensembl

610 We prepared the index from each reference sequence using makeblastdb and  
611 makembindex. We mapped the reads separately onto each reference in the order listed  
612 above. Reads mapped to the reference genome and transcriptome were merged into a  
613 'lost human reads' category. The following options were used to map the reads using  
614 Megablast: for each reference: task = megablast, use\_index = true, perc\_identity = 90,  
615 outfmt = 6, max\_target\_seqs =1, e-value =  $1e^{-05}$ .

616

617 ***C. Identification of hyper-edited reads***

618 We have used hyper-editing pipeline (HE-pipeline  
619 <http://levanonlab.ls.biu.ac.il/resources/zip>), which is capable of identifying hyper-edited  
620 reads. When running HE-pipeline, additional changes can be made to parallelize the scripts  
621 for use with UCLA's Hoffman2 cluster. Before proceeding, follow the instructions in  
622 the README that is included with the scripts to prepare the reference and provide the  
623 necessary third-party tools. Ensure that the output directory is set correctly  
624 in config\_file.sh (it is acceptable to use a single output directory), and check that the list of  
625 input files has been prepared correctly.

626

627 Details on how to run HE-pipeline are available here:

628 <https://github.com/smangul1/rop/wiki/How-to-run-hyper-editing-pipeline>

629

#### 630 *D. Mapping unmapped reads onto the repeat sequences*

631 We filtered out the reads that failed QC and lost human reads. The remaining reads were  
632 mapped to the reference repeat sequences. The reference repeat sequences were  
633 downloaded from Repbase v20.07 (<http://www.girinst.org/rebase/>). Human repeat  
634 elements (humrep.ref and humsub.ref) were merged into a single reference. We prepared  
635 the index from the merged repeat reference using makeblastdb and makemindex from  
636 BLAST+. In total, we obtained sequences for 1,117 repeat elements. The following options  
637 were used to map the reads using the Megablast: task = megablast, use\_index = true,  
638 perc\_identity = 90, outfmt = 6, max\_target\_seqs = 1, e-value =  $1e^{-05}$ . Blast hits with  
639 alignment length shorter than 80% of the read length were discarded (corresponding to  
640 80bp of the 100bp read).

641

642 The repeat elements from humrep.ref and humsub.ref were classified into families and  
643 classes using RepeatMasker annotations (hg19\_rmsk\_TE\_prepared\_noCDS.bed).  
644 Repetitive reads identified from the unmapped reads were confirmed by directly applying  
645 Repeatmasker (Tarailo-Graovac & Chen, 2009).

646



647 *E. Workflow to detect 'non-co-linear' reads (trans-splicing, gene fusions, and circRNAs)*

648

649 We divide non-co-linear reads into three categories:

650

- 651 1) gene fusion characterized by reads that map on different chromosomes
- 652 2) trans-splicing events characterized by reads that map on the same chromosome,  
653 but are at least 1 Mb apart from each other
- 654 3) circRNAs characterized by reads that map in a head-to-tail configuration on the  
655 same chromosome

656

657 To distinguish between these three categories, we make use of circExplorer2 (Zhang et al.,  
658 2016), which was recently identified as one of the best tools to detect circRNAs (Hansen  
659 et al., 2015). CircExplorer2 relies on Tophat-Fusion and thus allows also the monitoring  
660 NCL events in the same run. TopHat-Fusion (v2.0.13, bowtie1 v0.12.9) and circExplorer2  
661 (v2.2.4) were invoked with the following commands:

662

```
663 $ tophat2 -o tophat-output-directory -p 4 --fusion-search --keep-fasta-order --bowtie1 --  
664 no-coverage-search bowtie1-index fastq-file
```

665

```
666 $ python CIRCexplorer2 parse -t TopHat-Fusion -o circrna-output-folder tophat-output-  
667 directory/accepted_hits.bam
```

668

669 \$ python CIRCexplorer2 annotate -r ensemble-reference.txt -g genome.fa circrna-output-  
670 folder

671

672 To separate potential gene and trans-fusions from the TopHat-Fusion output, we ran a  
673 ruby custom script, which is part of the ROP pipeline.

#### 674 *F. Mapping unmapped reads onto the V(D)J recombinations of B and T cell receptors*

675 Gene segments of B cell receptors (BCR) and T cell receptors (TCR) were imported from  
676 IMGT (International ImMunoGeneTics information system):  
677 (<http://www.imgt.org/vquest/refseqh.html#V-D-J-C-sets>).

678 IMGT database contains:

- 679 • Variable (V) gene segments
- 680 • Diversity (D) gene segments
- 681 • Joining (J) gene segments

682 Unmapped reads categorized by step (A)-(D) were filtered out. We used IgBLAST (v. 1.4.0)  
683 with stringent e-value threshold (e-value <  $10^{-20}$ ) to map the remaining high-quality  
684 unmapped reads onto the V(D)J regions of the of the BCR and TCR loci. Reference files  
685 with BCR and TCR VDJ gene segments are distributed with ROP protocol and available at  
686 [https://drive.google.com/folderview?id=0Bx1fyWeQo3cOTkhKdHFDb3c5MjA&usp=shari](https://drive.google.com/folderview?id=0Bx1fyWeQo3cOTkhKdHFDb3c5MjA&usp=sharing)  
687 [ng](https://drive.google.com/folderview?id=0Bx1fyWeQo3cOTkhKdHFDb3c5MjA&usp=sharing)  
688

689 The complete list of the references is presented in Supplemental Methods Table SM5.

| Name of the reference file | Description of the gene |
|----------------------------|-------------------------|
|----------------------------|-------------------------|

|                         |                             |
|-------------------------|-----------------------------|
| <b>BCR heavy chain</b>  |                             |
| <b>IGHV.fa</b>          | V genes of BCR heavy chain  |
| <b>IGHD.fa</b>          | D genes of BCR heavy chain  |
| <b>IGHJ.fa</b>          | J genes of BCR heavy chain  |
| <b>BCR light chains</b> |                             |
| <b>IGLV.fa</b>          | V genes of BCR lambda chain |
| <b>IGLJ.fa</b>          | J genes of BCR lambda chain |
| <b>IGKV.fa</b>          | V genes of BCR kappa chain  |
| <b>IGKJ.fa</b>          | J genes of BCR kappa chain  |
| <b>TCR chains</b>       |                             |
| <b>TCRAV.fa</b>         | V genes of TCR alpha chain  |
| <b>TCRAJ.fa</b>         | J genes of TCR alpha chain  |
| <b>TCRBV.fa</b>         | V genes of TCR beta chain   |
| <b>TCRBD.fa</b>         | D genes of TCR beta chain   |
| <b>TCRBJ.fa</b>         | J genes of TCR beta chain   |
| <b>TCRGV.fa</b>         | V genes of TCR gamma chain  |
| <b>TCRGJ.fa</b>         | J genes of TCR gamma chain  |
| <b>TCRDV.fa</b>         | V genes of TCR delta chain  |
| <b>TCRDD.fa</b>         | D genes of TCR delta chain  |
| <b>TCRDJ.fa</b>         | J genes of TCR delta chain  |

691 Supplemental Methods Table SM5. List of the references files prepare for V-D-J from BCR  
692 and TCR loci.

693

694 We prepared the index from each reference sequence using makeblastdb and  
695 makemindex from BLAST+. The following options were used to map the reads using  
696 IgBLAST: -germline\_db\_V; germline\_db\_D; -germline\_db\_J; -organism=human; -outfmt =  
697 7; -evalue = 1e-20.

698

699 The number of genes and gene alleles per antibody locus is presented in Supplemental  
700 Methods Table SM6.

701

|                  | V domain         | D domain | J domain       |
|------------------|------------------|----------|----------------|
| <i>IGH</i> locus | <b>136</b> (370) | 27(34)   | 9(16)          |
| <i>IGK</i> locus | <b>100</b> (124) | -        | 5(9)           |
| <i>IGL</i> locus | <b>70</b> (111)  | -        | 7(10)          |
| TCRA locus       | <b>54</b> (112)  | -        | <b>61</b> (68) |
| TCRB locus       | <b>77</b> (160)  | 2(3)     | <b>14</b> (16) |
| TRG locus        | <b>14</b> (26)   | -        | 5(6)           |
| TRD locus        | <b>8</b> (22)    | 0(0)     | 1(4)           |

702

703 Supplemental Methods Table SM6. The number of V-D-J genes and gene alleles per  
704 antibody locus. Number of genes is presented in bold and number of gene alleles is

705 presented in parenthesis. Gene and gene alleles of B cell receptors (BCR/IG) and T cell  
706 receptors (TCR) were imported from IMGT.

707

708 We assessed combinatorial diversity of the antibody repertoire by looking at the  
709 recombinations of the VJ gene segments of BCR and TCR loci. We extracted the reads  
710 spanning the V-J gene boundaries.

711

### 712 *G. Identification of microbial reads*

713 Unmapped reads mapping in step (A)-(E) were filtered out. The remaining reads were high-  
714 quality non-human reads used to profile the taxonomic composition of the microbial  
715 communities. We used MetaPhlan2 (Metagenomic Phylogenetic Analysis, v 2.0) to assign  
716 reads on microbial genes and to obtain a taxonomic profile. The database of the microbial  
717 marker genes is provided by MetaPhlan. We run MetaPhlan in two stages as follow: the  
718 first stage identifies the candidate microbial reads (i.e. reads hitting a marker), while the  
719 second stage profiles metagenomes in terms of relative abundances – the commands used  
720 are as follow:

```
721     ➤ metaphlan.py <fastq> <map> --input_type multifastq --bowtie2db  
722       bowtie2db/mpa -t reads_map --nproc 8 --bowtie2out
```

```
723     ➤ metaphlan.py --input_type blastout <bowtie2out.txt> -t rel_ab <tsv>
```

724

725 The output of the first stage is a file containing a list of candidate microbial reads with the  
726 microbial taxa assigned (.map file). The second stage outputs the taxonomic profile (taxa

727 detected and its relative abundance, in tab separated format (.tsv file). We used taxa  
728 detected from stage 2 to extract the reads associated with it in stage 1.  
729 In addition to MetaPhlan2 we used to create the curated database of taxa-specific genes,  
730 we mapped the reads onto the entire reference genomes of microbial organisms. We used  
731 Megablast (BLAST+ 2.2.30) to align reads onto the collection of bacterial, viral, and  
732 eukaryotic pathogens reference genomes. Bacterial and viral genomes were downloaded  
733 from NCBI <ftp://ftp.ncbi.nih.gov/> on February 1, 2015. Genomes of eukaryotic pathogens  
734 were downloaded from EuPathDB database, which is available at:  
735 <http://eupathdb.org/eupathdb/>.  
736 The following parameters were used for the megablast alignment: e-value =  $10^{-5}$ ,  
737 perc\_identity = 90. The Megablast hits shorter than 80% of the input read sequence were  
738 removed (corresponding to 80bp of the 100bp read).

739

#### 740 *Comparing diversity across groups*

741 First, we sub-sampled unmapped reads to the number of reads corresponding to a sample  
742 with the smallest number of unmapped reads. Diversity within a sample was assessed  
743 using the richness and alpha diversity indices. Richness was defined as a total number of  
744 distinct *events* in a sample. We used Shannon Index (SI), incorporating richness and  
745 evenness components, to compute alpha diversity, which is calculated as follows:

746 
$$SI = - \sum (p \times \log_2(p))$$

747 We used beta diversity (Sørensen–Dice index) to measure compositional similarities  
748 between the samples in terms of gain or loss in the events. We calculated the beta  
749 diversity for each combination of the samples, and we produced a matrix of all pairwise  
750 sample dissimilarities. The Sørensen–Dice beta diversity index is measured as  $1 - \frac{2J}{A+B}$ ,  
751 where J is the number of shared events, while A and B are the total number of events for  
752 each sample, respectively.

753

#### 754 Percentage of unmapped reads calculation

755 We calculated the percentage of unmapped reads using the following formula:

$$756 \quad P_{\text{unmapped}} = \frac{(N_{\text{ud}} + (N_{\text{uc}} \times 2))}{(N_{\text{total}} \times 2)}$$

757 where,

758  $N_{\text{ud}}$  – number of discordant unmapped reads (one end is mapped, while the other end is  
759 unmapped);

760  $N_{\text{uc}}$  – number of unmapped read pairs (both ends are unmapped);

761  $N_{\text{total}}$  – total number of read pairs (fragments).

762

#### 763 The robustness of the ROP results against changing the thresholds for each of the ROP 764 steps

765

766 We have performed the robustness analysis to investigate the impact of the thresholds  
767 used in each step of the ROP approach. For each ROP step, we have reported number of

768 reads identified under different thresholds. The results are presented as cumulative  
769 frequency plots.

770

**a**

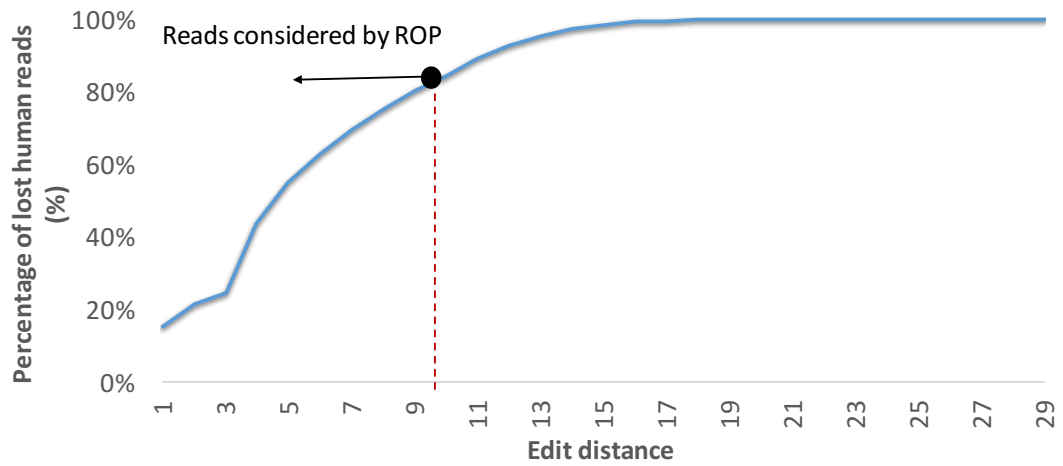

771

**b**

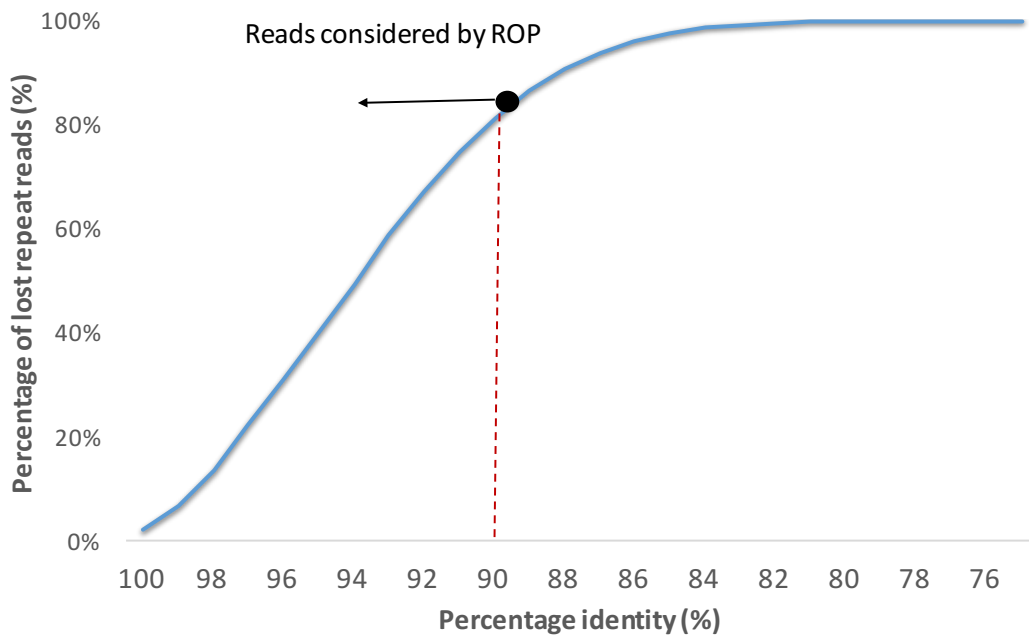

772



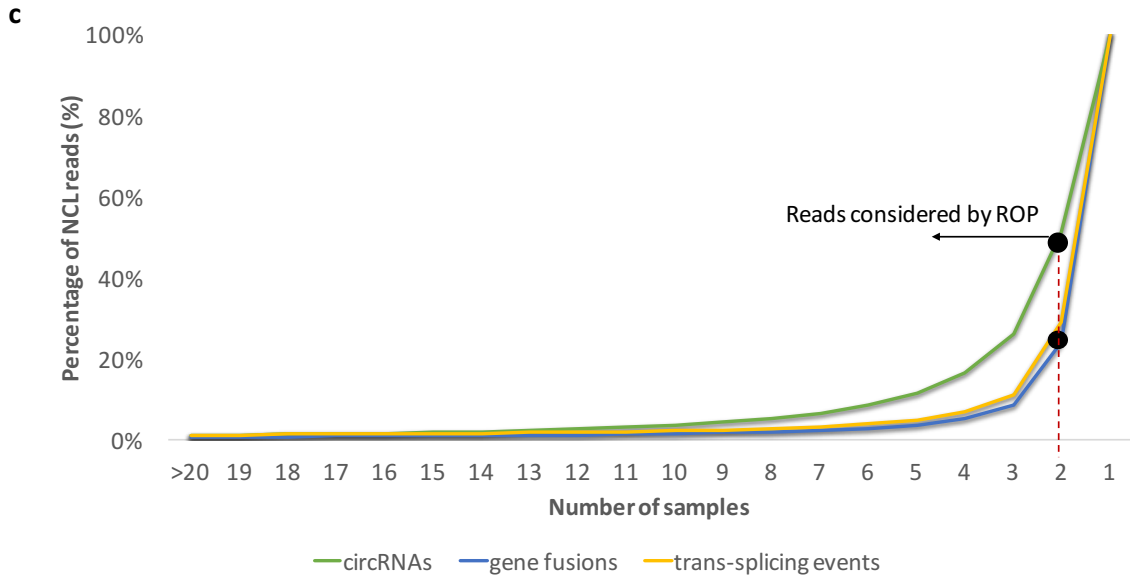

773

774

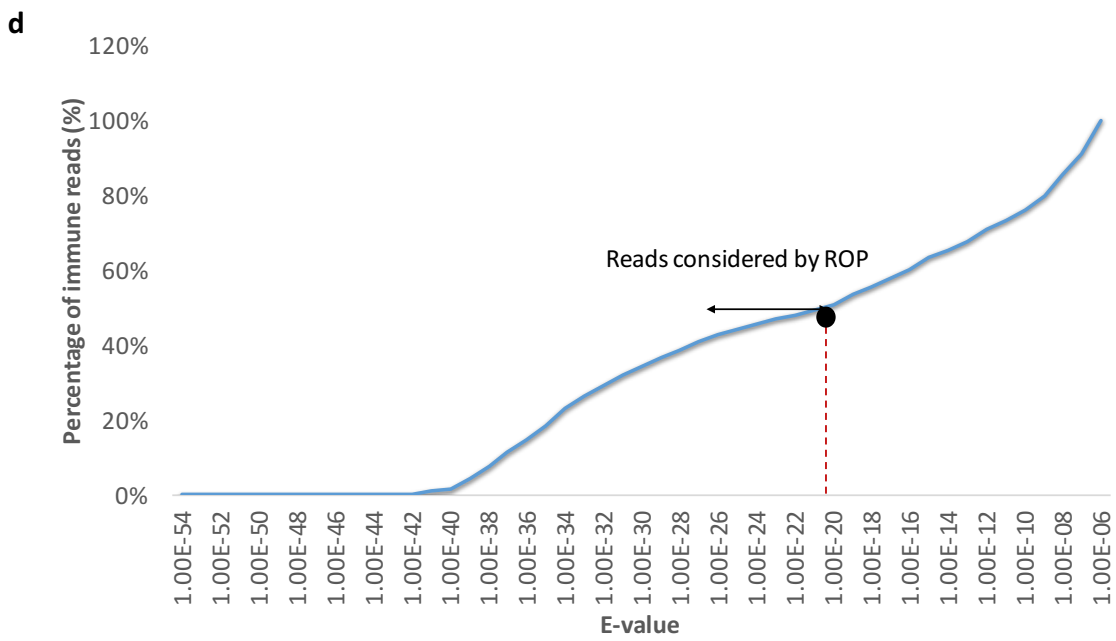

775

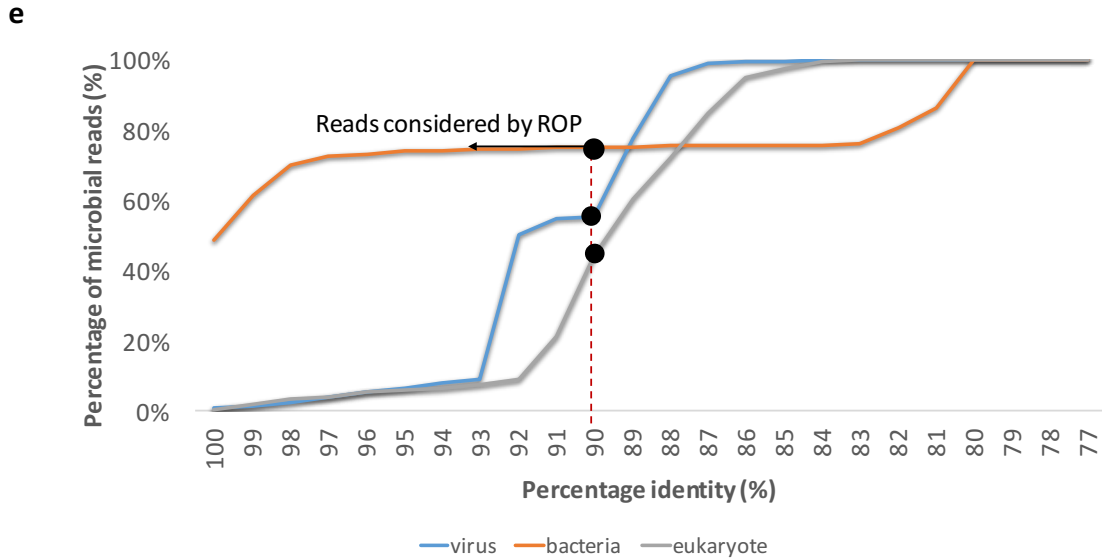

776

777

778 **Supplemental Methods Figure SM1. Percentage of reads identified under different**

779 **threshold values.** Results are presented as cumulative frequency plots for each step of ROP.

780 ROP threshold is highlighted with red line.

781 The percentages are the averages across 87 samples. (a) Step 2 (Remap to human

782 references). Cumulative frequency plot reporting the percentage of lost human reads

783 averaged across all samples (y-axis) identified under different threshold (edit distance) (x-

784 axis). Edit distance was calculated as the minimum number of operations required to

785 transform a read sequence into the corresponding reference subsequence. Reads are

786 grouped by edit distance with the transcriptome or the genome reference. (b) Step 3 (Map

787 to repeat sequences). Cumulative frequency plot reporting the percentage of lost repeat

788 reads (y-axis) identified under different threshold averaged across (percentage identity) (x-

789 axis). (c) Step 4 (NCL RNA profiling). Cumulative frequency plot of the percentage of NCL

790 reads averaged across all samples (y-axis) identified under different thresholds (number of

791 reads supporting NCL event) (x-axis). Results are reported separately for circRNAs, gene  
792 fusions and trans-splicing events. (d) Step 5 (B and T cell receptors profiling). Cumulative  
793 frequency plot reporting the percentage of immune reads averaged across all samples (y-  
794 axis) identified under different threshold (e-value) (x-axis). (e) Step 6 (Microbiome  
795 profiling). Cumulative frequency plot reporting the percentage of microbial reads averaged  
796 across all samples (y-axis) identified under different threshold (percentage identity) (x-  
797 axis). Results are reported separately for viral, bacterial and eukaryotic reads.

798

799

#### 800 *The impact of ROP step ordering on the read classification*

801 We have investigated the effect of the ordering on read classification. Ordering of ROP  
802 steps will have an effect only when references of each step share homologous sequences.  
803 For each ROP step, we have swapped its order with another ROP step. For example, we  
804 considered swapping 'Remapping to human references' reads and 'QC' steps. Before  
805 swapping, 'Remapping to human references' was number 2 in the queue. After swapping,  
806 it became number 1.

807

808 We observed a major effect of swapping 'Remapping to human references' with all other  
809 steps. For example, swapping 'Remapping to human references' and 'QC' steps results in  
810 classifying 79.6% of rRNA reads as lost human reads. Similarly, swapping 'Remapping to  
811 human references' and 'Microbiome profiling' steps results in classifying 0.2% of the lost  
812 human reads as microbiome reads. In other words, this swap produces a 27.8% increase

813 of microbiome reads. Similarly, considering 'B and T lymphocytes profiling' prior to  
814 'Remapping to human references' produces a 50.8% increase of identified immune reads.  
815 Considering partial mapping of BCR and TCR reads prior to the 'Remapping to human  
816 references' step may produce many false positives. Swapping other steps of ROP resulted  
817 in minor effects (i.e. <1% of reads from each category were effected).

818

819

820

821 *The impact of mapping parameters and RNA-Seq aligners on the number of unmapped*  
822 *reads*

823 Five samples were randomly selected among each library preparation protocol. In total,  
824 we obtained ten samples for the mapping rate comparison. All selected samples were  
825 aligned to the human genome (hg19) using two tools, Tophat2 and STAR, and three  
826 different sensitivities for each tool – default, sensitive setting, and very sensitive setting –  
827 as noted below in Supplemental Table S5. The average runtime for Tophat per million reads  
828 was 2.5 hours; STAR, 0.13 hours; and Novoalign, 9.1 hours. Novoalign was not considered  
829 in the analysis due to its substantially longer running time that made it infeasible for the  
830 protocol.

831 The mapping rate for each tool and each setting is shown in Supplemental Table S6. The  
832 mapping rate was significantly higher in Tophat when compared with STAR and using the  
833 default option for each tool ( $p < 0.03$ ). However, there is no significant difference in  
834 mapping rate when comparing different mapping settings ( $p > 0.92$  under two-tailed t-

835 tests for Tophat,  $p > 0.86$  for STAR).

836

837

838

839

840 *Complexity analysis using Capture Recapture Model*

841 Given a sequencing experiment, the Read Origin Protocol (ROP) attempts to classify every  
842 sequenced read in the experiment to an “origin” class. These origins can be considered to  
843 be features of interest (e.g. exons, retroviral, immune, or bacterial). Since every read is  
844 assigned to only one class, we can consider the reads assigned to a specific class to be a  
845 random sample from the population of possibilities within that class. This leads us to  
846 consider statistical models for population sampling, which are known as “capture-  
847 recapture” models (Bunge & Fitzpatrick, 1993).

848 Using capture-recapture models allows us to make statistical inferences on several  
849 quantities of interest. Of primary interest is the total number of possibilities in the feature.  
850 We shall refer to this as the feature size but is commonly known in the statistics literature  
851 as species richness (Bunge & Fitzpatrick, 1993; Deng, Daley, & Smith, n.d.). We also  
852 consider the number of identified possibilities within a feature as a function of the number  
853 of reads. We call this the complexity of the feature, in line with the notation of Daley and  
854 Smith (T. Daley & Smith, 2013). The rate of change in the complexity curve is proportional  
855 to the probability the next read in a previously unobserved class (T. P. Daley, 2014). This  
856 quantity is commonly known in statistics literature as the mathematical coverage (Good,

857 1953), but to avoid confusion with sequencing coverage, we call this the discovery  
858 probability (Favaro, Lijoi, & Prünster, 2012). One minus the discovery probability will be  
859 called the saturation of the feature.

### 860 *Statistical Model*

861 Suppose we sequence  $N$  reads from an experiment. There are  $C$  feature classes,  
862 represented in the sequencing library with proportions  $\pi_1, \dots, \pi_C$ . Features may overlap,  
863 so it is not necessary that the proportions sum to one. The features are all known and  
864 defined beforehand. This trait is in contrast to the number of classes within each feature.  
865 Within each feature  $c$ , there are a fixed but unknown number of classes;  $S_c$  represented in  
866 the experiment. Within the feature, these are represented with relative proportions

$$867 \quad p_1, \dots, p_{S_c}, \sum_{i=1}^{S_c} p_i = 1$$

868 If we are interested in the relative proportions within the experiment, we multiply the  
869 relative proportion within the feature by the relative abundance of the feature within the  
870 experiment.

871 The problem is that we only have information on the classes that were sequenced in the  
872 experiment. We observed  $D_c \leq S_c$  classes with observed frequencies  $x_i = \#$  reads from  
873 class  $i$  with  $\sum_{i=1}^{S_c} x_i = N_c$  and  $\sum_{c=1}^C N_c = N$ .

874 The problem of estimating the complexity is to estimate the number of expected distinct  
875 classes observed as a function of reads sequenced. We use the non-parametric empirical  
876 Bayesian? approach of Daley and Smith (T. Daley & Smith, 2013) to estimate the feature  
877 complexity curve. The limit of the feature complexity curve can be regarded as an estimate

878 of the feature size (Colwell & Coddington, 1994).

879 The discovery probability of the observed experiment is the sum of the relative proportions  
880 of the unobserved classes,

881 
$$\sum_{i=1}^{s_c} p_i \mathbf{1}(x_i = 0).$$

882 The non-parametric empirical Bayes estimator for this quantity is given by the Good Turing  
883 formula,  $(\sum_{i=1}^{s_c} \frac{1(x_i=1)}{N_c})$ .

#### 884 *Read Complexity Analysis*

885 We first examine the read complexity as determined by the mapped start position of the  
886 first end in the read pair. We observe little difference between the two libraries for the  
887 single end complexity (Supplemental Methods Figure SM3). We observe only an average  
888 of 20% and 29% of the mappable reads at the sequenced read depth. We estimate that all  
889 libraries are an average of 58% saturated; that is, we observed 58% of the abundance. This  
890 is natural since one would naturally sequence the most abundant reads first.

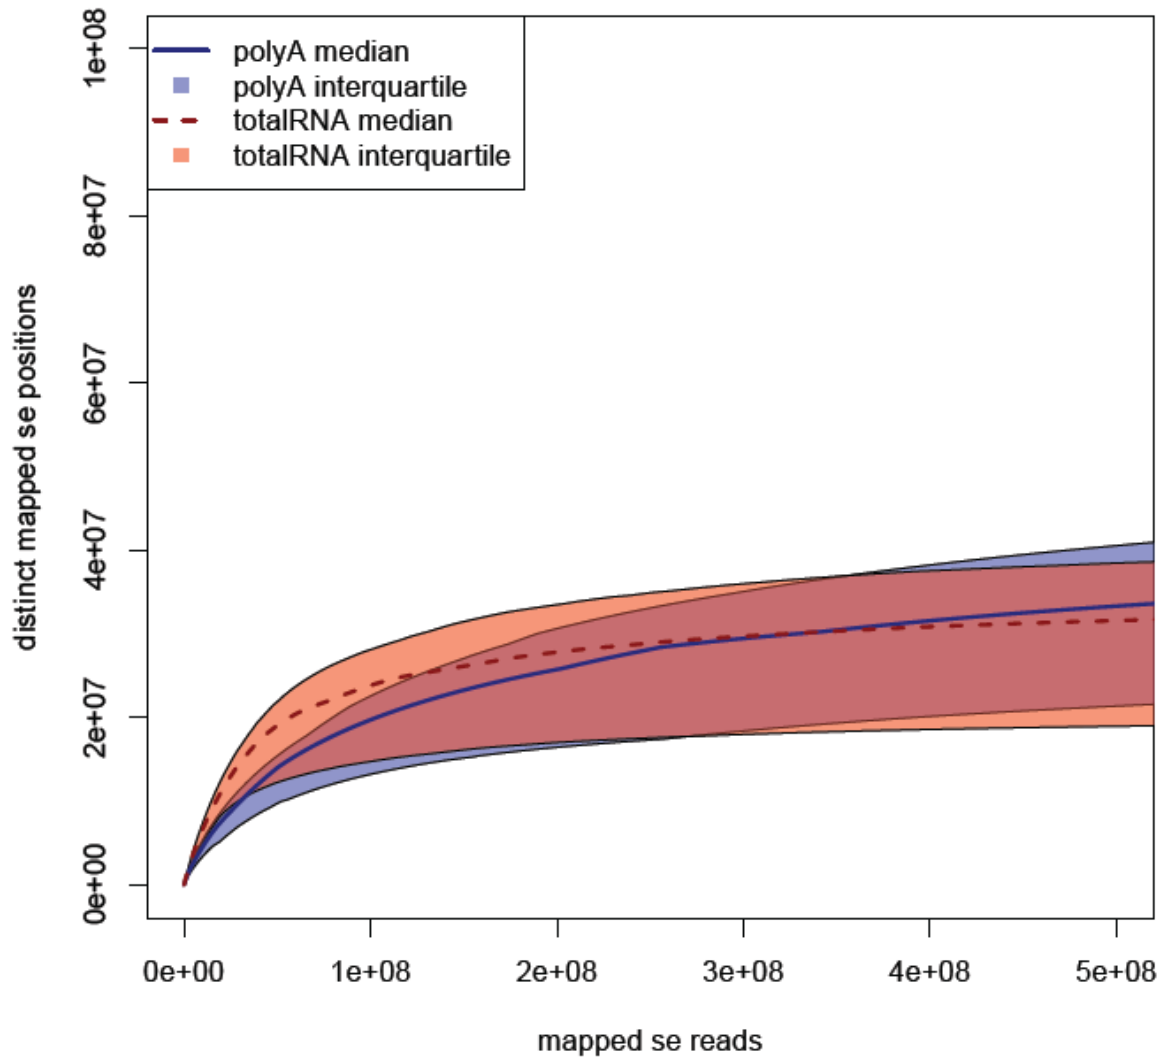

891

892 Supplemental Methods Figure SM3. Single end read complexity medians and interquartile  
 893 ranges across the two library preparations.

894

895 *Annotated Feature Complexity Analysis*

896 The mapped reads can be assigned to features within the genome. These include exons,  
 897 introns, coding sequences (CDS), and untranslated regions (UTR). In this section we shall  
 898 investigate the complexity of these features, which can be interpreted as estimating the



899 transcriptional diversity within these libraries.

900 As expected, more exons, CDSs, and UTRs were observed per sequenced fragment for the  
901 polyA libraries than for the totalRNA libraries. Yet all libraries are very saturated. Most of  
902 the abundant classes within these features have already been observed, and the  
903 unobserved features are extremely rare. This is in line with the common practice of  
904 sequencing a few tens of millions of reads for inferring differential expression.

905

906 To compare the saturation across libraries, we extrapolated the saturation to a common  
907 value. The saturation is asymptotically normal (Mao, 2004), and the sequencing depth is  
908 sufficiently high that we can use a standard t-test to investigate differences. The polyA  
909 libraries are more saturated when all the features for all libraries are extrapolated out to  
910 100 million observations (exons:  $p = 3.764E-16$ ; CDS:  $p = 1.036E-14$ ; UTR:  $p = 5.183E-14$ ;  
911 more significant differences were observed at lower depths, indicating that the differences  
912 are not artifacts of the sampling depth).

913

914 Despite the large saturation for all features across libraries, a multitude of unobserved  
915 classes remain (Supplemental Methods Table SM7). This means that most of the  
916 unobserved classes are exceedingly rare. For example, we estimate that there are an  
917 average of 41,990 unobserved exons in the polyA libraries. There is an average remaining  
918 abundance of  $1 - 0.9988 = 0.0012$ , implying that the average abundance of the  
919 unobserved exons is  $\frac{0.0012}{41990} = 2.86 E - 8$ . Since, on average, a read has  $2 \cdot 0.176 = 0.352$   
920 probability of overlapping an exon, the average abundance of the unobserved exons is  $1E-$

921 8 and the total abundance, 0.00042, gives the marginal probability that the next sequenced  
 922 read is a new exon. For the totalRNA libraries, the average abundance of the unobserved  
 923 exons is 3.2E-8. Similarly, we calculated the average abundance of the unobserved CDS for  
 924 polyA and totalRNA libraries as 1.84E-8 and 7.78E-8, respectively, and for UTRs it was 1.1E-  
 925 8 and 6.48E-8.  
 926

| Feature | Mean hits |          | Mean observed |          | Mean saturation |          | Mean estimated total |          |
|---------|-----------|----------|---------------|----------|-----------------|----------|----------------------|----------|
|         | polyA     | totalRNA | polyA         | totalRNA | polyA           | totalRNA | polyA                | totalRNA |
| Exons   | 10310521  |          | 110553        |          | 0.9969          |          | 145950               |          |
|         | 1771336   | 574543   | 11550         | 107498   | 0.9988          | 0.9956   | 15749                | 138829   |
| CDS     | 2         | 6        | 7             |          |                 |          | 7                    |          |
|         | 4791394   |          | 105820        |          | 0.984           |          | 131521               |          |
| UTR     | 8804113   | 231688   | 11606         | 99500    | 0.9977          | 0.9756   | 14406                | 123788   |
|         | 4359596   |          | 33165         |          | 0.9948          |          | 43136                |          |
| UTR     | 8035082   | 209304   | 37448         | 30524    | 0.9991          | 0.9920   | 49849                | 38997    |
|         |           | 7        |               |          | 3               | 9        |                      |          |

927  
 928 Supplemental Methods Table SM7. Mean number of observations, distinct observed  
 929 classes, observed saturation, and estimated total number of classes for exons, CDS, and

930 **UTR Features.**

931

932 Finally, we examined differences of diversity between case and controls for a fixed tissue  
933 type and library type. The results are quite anticlimactic, as we found little differences  
934 between cases and controls for extrapolated saturation and feature diversity. This  
935 indicates that there are little differences in transcriptome diversity between the two  
936 groups of case and controls. Alternatively, it may indicate that the differences between  
937 the two groups are so small that a much larger cohort is required to accurately infer the  
938 disparity.

939

940

941 **Genomic profiles across library preparation protocols**

942 Similar to Li, S. et al we observed that library preparation has a strong effect on the fraction  
943 of both mapped and lost human reads mapping to CDS and intronic regions. Genomic  
944 profile of mapped and unmapped reads across library preparation protocols is presented  
945 in **Supplemental Methods Figure SM4.**

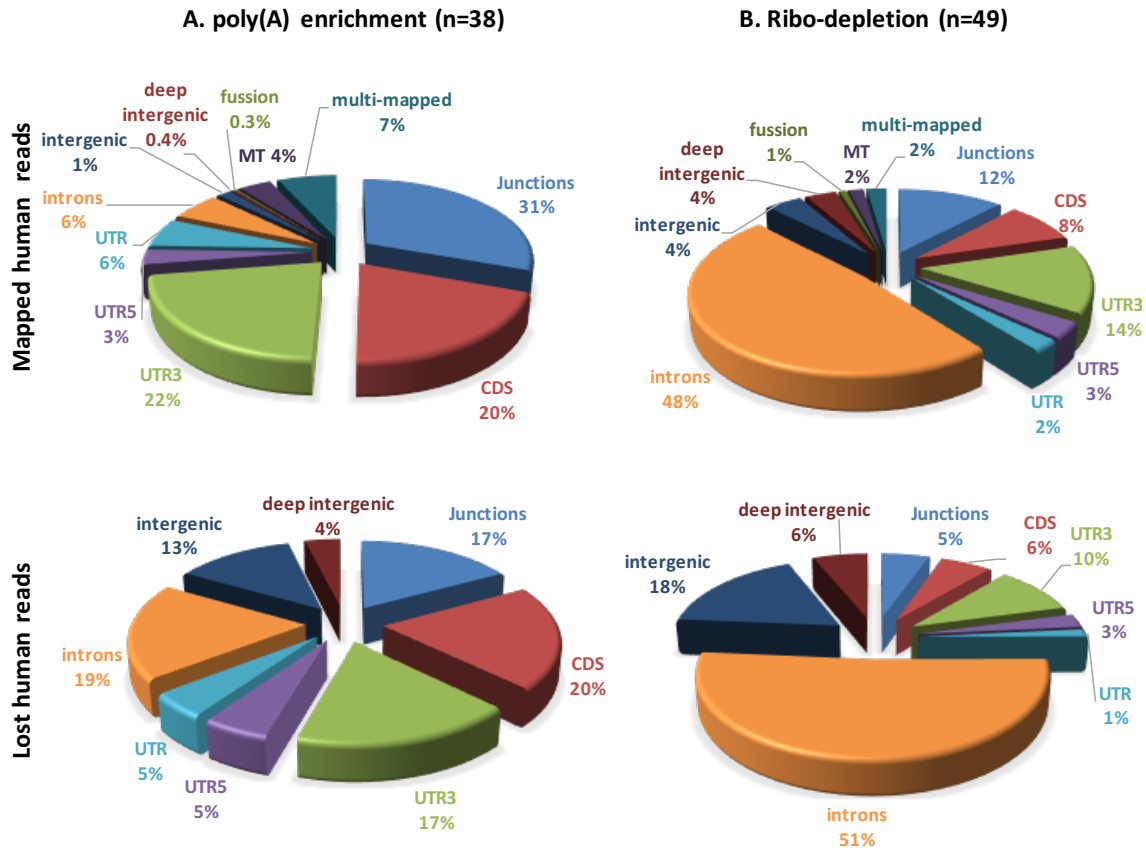

946

947

948 Supplemental Methods Figure SM4. Genomic profile of mapped and lost human reads

949 across poly(A) enrichment and ribo-depletion libraries.

950 (A) RNA-Seq samples were prepared by poly(A) enrichment protocol (n=38). (B) RNA-Seq

951 samples were prepared by ribo-depletion protocol (n=49). Mapped human reads are

952 identified as RNA-Seq reads that mapped to the human reference genome and

953 transcriptome (ENSEMBL hg19 build, ENSEMBL GRCh37 transcriptome) via tophat2. Lost

954 human reads are unmapped RNA-Seq reads that aligned to the human reference genome

955 and transcriptome (ENSEMBL hg19 build, ENSEMBL GRCh37 transcriptome) via more

956 sensitive Megablast alignment. Single alignment is reported for each read by Megablast.

957 ROP categorizes the reads into genomic categories based on the compatibility of each read

958 from the pair with the features defined by the Ensembl gene annotations. Percentages are  
959 calculated as a fraction of reads from a category from the total number of mapped or lost  
960 human reads. Junction read is defined as a read spanning exon-exon boundary; CDS, UTR3,  
961 UTR5: reads overlapping CDS, UTR3 or UTR5 region; UTR: reads simultaneously  
962 overlapping UTR3 and UTR5 regions; intronic: reads overlapping intronic regions;  
963 intergenic: reads mapped within the proximity of 1Kb from the gene boundaries; deep  
964 intergenic: reads mapped beyond the proximity of 1Kb from the gene boundaries; MT:  
965 mitochondrial reads; multi-mapped: reads mapped to multiple locations of the human  
966 genome; fusion: reads from the read pair mapped to different chromosomes.

967

968 Genomic profile across tissue types and library preparation methods in S1. Genomic Profile  
 969 is obtained based on both mapped and lost human RNA-Seq reads.

**A. Genomic profile obtained based on mapped RNA-Seq reads. Mapped human reads are identified as the RNA-Seq reads mapped to the reference genome and transcriptome (ENSEMBL hg19 build, ENSEMBL GRCh37 transcriptome) via tophat2.**

| Tissue                                       | Whole blood        | Nasal epithelium   | Lung epithelium |
|----------------------------------------------|--------------------|--------------------|-----------------|
| N                                            | 19                 | 19                 | 49              |
| Library preparation method                   | poly(A) enrichment | poly(A) enrichment | ribo-depletion  |
| Splice junction reads, %*, mean (std)        | 23.3% (3.3%)       | 29.8% (2.2%)       | 10.0% (3.3%)    |
| CDS reads %, mean (std)                      | 18.0% (3.1%)       | 16.9% ( 1.3%)      | 6.9% (2.0%)     |
| UTR3 reads %, mean (std)                     | 15.6% (3.1%)       | 22.5% (1.7%)       | 11.4% (2.5)     |
| UTR5 reads %, mean (std)                     | 3.2% (0.7%)        | 2.2% (0.3%)        | 2.6% (0.7%)     |
| UTR** reads %, mean (std)                    | 4.3% (0.8%)        | 5.9% (0.5%)        | 1.9% (0.6%)     |
| Intronic reads %, mean (std)                 | 5.6% (1.6%)        | 4.4% (0.8%)        | 39.4% (6.5%)    |
| Proximate inter-genic*** reads %, mean (std) | 1.2% (0.6%)        | 1.5% (0.6%)        | 3.3% (0.4%)     |
| Deep inter-genic reads**** %, mean (std)     | 0.3% (0.1%)        | 0.3% (0.1%)        | 2.8% (0.9%)     |
| Mitochondrial (MT) reads %*, mean (std)      | 2.3% (1.0%)        | 4.3% (1.3%)        | 1.5% (1.8%)     |
| Milti-mapped reads %, mean (std)             | 10.6% (2.4%)       | 1.9% (0.2%)        | 1.9% (0.5%)     |
| Fusion reads %, mean (std)                   | 0.2% (0.1%)        | 0.4 % (0.1%)       | 0.7% (0.2%)     |

970

**B. Genomic profile obtained based on lost human reads. Lost human reads are the unmapped RNA-Seq reads that aligned to the human reference genome and transcriptome (ENSEMBL hg19 build, ENSEMBL GRCh37 transcriptome) via more sensitive Megablast alignment.**

| Tissue                                       | Whole blood        | Nasal epithelium   | Lung epithelium |
|----------------------------------------------|--------------------|--------------------|-----------------|
| N                                            | 19                 | 19                 | 49              |
| Library preparation method                   | poly(A) enrichment | poly(A) enrichment | ribo-depletion  |
| Splice junction reads, %*, mean (std)        | 1.5% (0.5%)        | 0.7% (0.1%)        | 0.6% (0.2%)     |
| CDS reads %, mean (std)                      | 1.9% (0.7%)        | 0.7% (0.1%)        | 0.7% (0.2%)     |
| UTR3 reads %, mean (std)                     | 1.3% (0.3%)        | 0.9% (0.1%)        | 1.1% (0.2%)     |
| UTR5 reads %, mean (std)                     | 0.4% (0.1%)        | 0.2% (0.03%)       | 0.3% (0.1%)     |
| UTR** reads %, mean (std)                    | 0.4% (0.1%)        | 0.2% (0.1%)        | 0.2% (0.1%)     |
| Intronic reads %, mean (std)                 | 1.0% (0.4%)        | 1.3% ( 1.1%)       | 5.9% (3.1%)     |
| Proximate inter-genic*** reads %, mean (std) | 0.6% (0.4%)        | 1.0% (1.1%)        | 2.1% (2.5%)     |
| Deep inter-genic reads**** %, mean (std)     | 0.2% (0.1%)        | 0.3% (0.3%)        | 0.7% (0.4%)     |
| Mitochondrial (MT) reads %*, mean (std)      | 0.0% (0.0%)        | 0.0% (0.0%)        | 0.0% (0.0%)     |

Notes :

- \* percentage from the total number of reads are reported
- \*\* reads simultaneously overlapping UTR3 and UTR5 regions
- \*\*\* mapped with the 1K proximity from gene boundaries
- \*\*\*\* mapped further than 1K from the gene boundaries

971

972

973 Repeat profile across tissues types and library preparation methods.

974 Repeat profile is based on both mapped and lost repeat reads.

**A. Repeat profile obtained based on mapped RNA-Seq reads. Mapped reads were categorized based on the overlap with the repeat instances prepared from RepeatMasker annotation (Repeatmasker v3.3, Repeat Library 20120124).**

| Tissue                     | Whole blood | Nasal epithelium | Lung epithelium |
|----------------------------|-------------|------------------|-----------------|
| N                          | 19          | 19               | 49              |
|                            | poly(A)     | poly(A)          |                 |
| Library preparation method | enrichment  | enrichment       | ribo-depletion  |
| L1, %*, mean               | 0.4%        | 0.5%             | 5.5%            |
| L2, %, mean                | 0.2%        | 0.2%             | 1.0%            |
| CR1, %, mean               | 0.02%       | 0.01%            | 0.1%            |
| Alu, %, mean               | 1.0%        | 1.0%             | 2.5%            |
| MIR, %, mean               | 0.1%        | 0.1%             | 0.6%            |
| ERV1-MaLR, %, mean         | 0.2%        | 0.2%             | 1.1%            |
| ERV1, %, mean              | 0.2%        | 0.2%             | 0.8%            |
| ERVK, %, mean              | 0.0%        | 0.0%             | 0.1%            |
| ERVL, %, mean              | 0.1%        | 0.1%             | 0.5%            |
| RNA, %, mean               | 0.0%        | 0.0%             | 0.2%            |
| hAT-Charlie, %, mean       | 0.1%        | 0.1%             | 0.4%            |
| TcMar-Tigger, %, mean      | 0.04%       | 0.1%             | 0.5%            |
| Others, %, mean            | 0.05%       | 0.1%             | 0.3%            |

\* Percentage from the total number of reads

975

**B. Repeat profile obtained based on lost repeat reads. Lost human reads are the unmapped RNA-Seq reads that aligned to human reference genome and transcriptome (ENSEMBL hg19 build, ENSEMBL GRCh37 transcriptome) via more sensitive Megablast alignment.**

| Tissue                     | Whole blood | Nasal epithelium | Lung epithelium |
|----------------------------|-------------|------------------|-----------------|
| N                          | 19          | 19               | 49              |
|                            | poly(A)     | poly(A)          |                 |
| Library preparation method | enrichment  | enrichment       | ribo-depletion  |
| %, mean*                   |             |                  |                 |
| hAT, mean                  | 0.0001%     | 0.0004%          | 0.0000%         |
| TcMar-Mariner, mean        | 0.0001%     | 0.0005%          | 0.0001%         |
| TcMar-Tigger, mean         | 0.0001%     | 0.0015%          | 0.0001%         |
| L1, mean                   | 0.0045%     | 0.1409%          | 0.0048%         |
| ERVK, mean                 | 0.0002%     | 0.0026%          | 0.0001%         |
| ERV, mean                  | 0.0017%     | 0.0082%          | 0.0014%         |
| ERV1, mean                 | 0.0025%     | 0.0106%          | 0.0016%         |
| ERVL, mean                 | 0.0000%     | 0.0014%          | 0.0000%         |
| Satellite, mean            | 0.0001%     | 0.0006%          | 0.0000%         |
| Alu, mean                  | 0.0495%     | 0.0896%          | 0.0382%         |
| Deu, mean                  | 0.0001%     | 0.0024%          | 0.0001%         |
| Others, mean               | 0.0051%     | 0.0072%          | 0.0025%         |

\*Percentage from the total number of reads

976

977





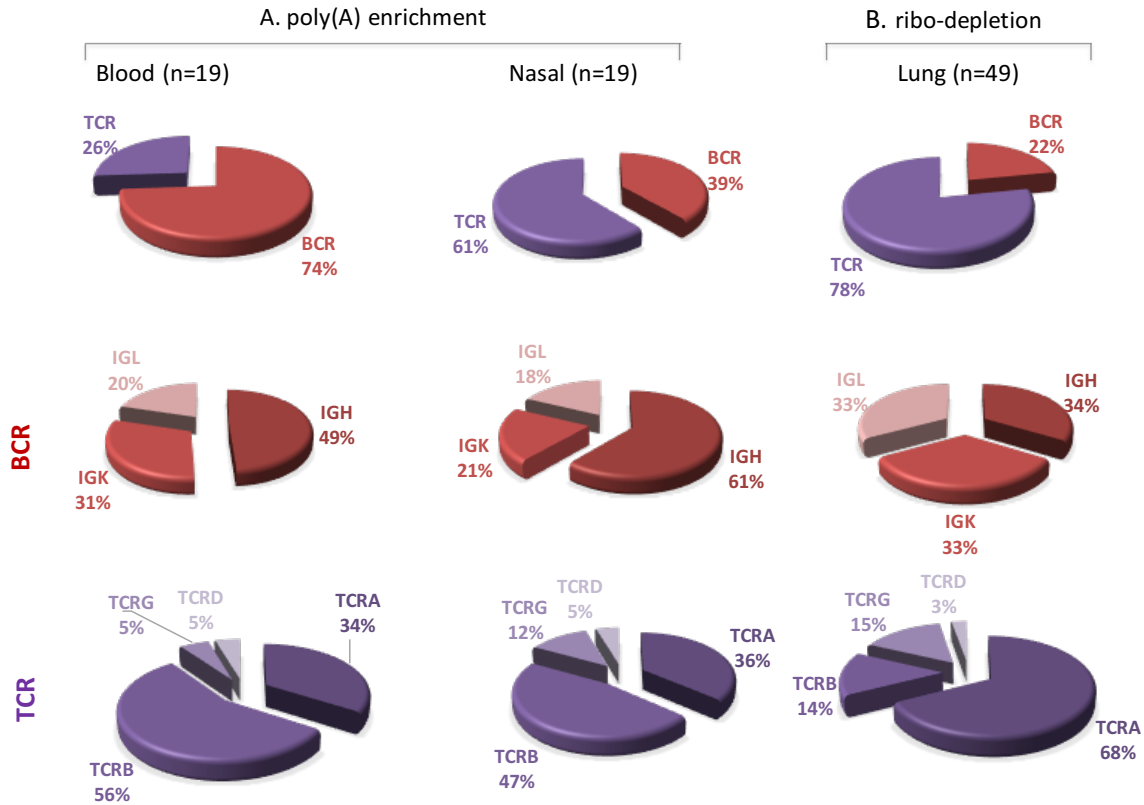

979

980 *Supplemental Methods Figure SM5.. Percentage of immune reads mapped to B-cell*  
 981 *receptor (BCR) and T-cell receptor (TCR) loci.*

982 (A) RNA-Seq samples were prepared by poly(A) enrichment protocol (whole blood and  
 983 nasal epithelium). (B) RNA-Seq samples were prepared by ribo-depletion protocol (lung  
 984 epithelium). Immune reads that are entirely mapped to BCR and TCR genes are identified  
 985 by tophat2. Immune reads with extensive somatic hyper mutations (SHM) and reads arising  
 986 from V(D)J recombination are identified by IgBlast. Blood samples show a larger fraction of  
 987 reads mapped to BCR locus, while nasal and lung epithelium samples show a larger fraction  
 988 of reads mapped to TCR locus. BCR are composed of heavy (IGH) and light chains. Among  
 989 the reads mapped to BCR locus, the number of reads mapped to immunoglobulin heavy

990 locus (IGH), immunoglobulin kappa locus (IGK), and immunoglobulin lambda locus (IGL) is  
991 determined. Among the reads mapped to TCR locus, the number of reads mapped to T cell  
992 receptor alpha locus (TCRA), T cell receptor beta locus (TCRB), T cell receptor gamma locus  
993 (TCRG), and T cell receptor delta locus (TCRD) is determined.

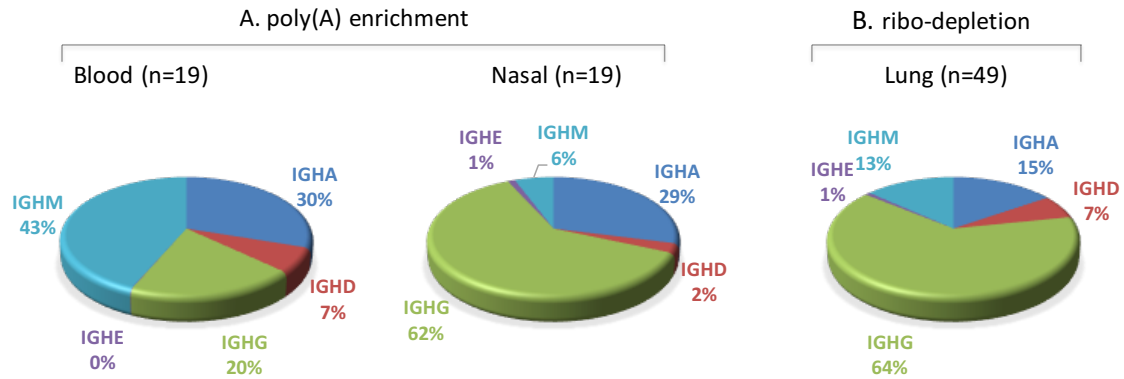

994

995 *Supplemental Methods Figure SM6..* Percentage of immune reads mapped to genes  
 996 encoding the constant region of immunoglobulin heavy locus (IGH).

997 (A) RNA-Seq samples were prepared by poly(A) enrichment protocol (whole blood and  
 998 nasal epithelium). (B) RNA-Seq samples were prepared by ribo-depletion protocol (lung

999 epithelium). Immune reads that are entirely mapped to IGHA (Immunoglobulin Heavy

1000 Constant Alpha), IGHD (Immunoglobulin Heavy Constant Delta), IGHG (Immunoglobulin

1001 Heavy Constant Gamma), IGHE (Immunoglobulin Heavy Constant Epsilon), and IGHM

1002 (Immunoglobulin Heavy Constant Mu) are identified by tophat2.

1003

1004

1005

1006

1007 **Number of RNA-Seq reads mapped to BCR and TCR genes (immune reads).**

1008 Reads entirely mapped to BCR and TCR genes are identified by Tophat2. Reads with

1009 extensive somatic hyper mutations (SHM) and reads arising from V(D)J recombination are

1010 identified by IgBLAST.

| <b>Tissue</b>                               | <b>Whole blood</b> | <b>Nasal epithelium</b> | <b>Lung epithelium</b> |
|---------------------------------------------|--------------------|-------------------------|------------------------|
| N                                           | 19                 | 19                      | 49                     |
| Library preparation method                  | poly(A) enrichment | poly(A) enrichment      | ribo-depletion         |
| Number of immune reads (tophat2), RPM, mean | 4805               | 107                     | 16                     |
| Number of immune reads (IgBlast), RPM, mean | 270                | 7                       | 1                      |
| Total number of immune reads , RPM, mean    | 5075               | 114                     | 17                     |

RPM : reads per million

1011

1012

1013

1014 **List of software tools used:**

- 1015 Tophat2 v.2.0.13 - <http://ccb.jhu.edu/software/tophat/index.shtml>
- 1016 STAR v2.5.2b - <https://github.com/alexdobin/STAR>
- 1017 Bowtie v.0.12.9 - <http://bowtie-bio.sourceforge.net/index.shtml>
- 1018 Bowtie2 v.2.2.9 - <http://bowtie-bio.sourceforge.net/bowtie2/index.shtml>
- 1019 Samtools v.0.1.18 - <http://www.htslib.org/>
- 1020 Bamtools v.2.3.0 - <https://github.com/pezmaster31/bamtools>
- 1021 FASTX-Toolkit v.0.0.13 - [http://hannonlab.cshl.edu/fastx\\_toolkit/](http://hannonlab.cshl.edu/fastx_toolkit/)
- 1022 SEQLEAN v(seqclean-x86\_64) - <http://sourceforge.net/projects/seqclean/files/>
- 1023 BLAST+ v.2.2.30 - <ftp://ftp.ncbi.nlm.nih.gov/blast/executables/blast+/LATEST/>
- 1024 IgBlast v.1.4.0- <http://www.ncbi.nlm.nih.gov/igblast/>
- 1025 TopHat-Fusion v.2.0.13- [http://ccb.jhu.edu/software/tophat/fusion\\_index.shtml](http://ccb.jhu.edu/software/tophat/fusion_index.shtml)
- 1026 circExplorer2 v.2.2.4 - <http://circexplorer2.readthedocs.io/>
- 1027 MetaPhlan2 v.2.0 - <http://huttenhower.sph.harvard.edu/metaphlan>
- 1028 HTSeq v.0.6.1 - <http://www-huber.embl.de/users/anders/HTSeq/>
- 1029 Preseq v 2.0- <http://smithlabresearch.org/software/preseq/>
- 1030 Quicksect v.0.0.2 - <https://github.com/brentp/quicksect>
- 1031
- 1032

1033 **Databases**

1034 Ensembl hg19 - [http://www.ensembl.org/Homo\\_sapiens/Info/Index](http://www.ensembl.org/Homo_sapiens/Info/Index)

1035 Human ribosomal DNA complete repeating unit -

1036 <http://www.ncbi.nlm.nih.gov/nucore/U13369>

1037 GTF formatted file for repeat annotations-

1038 <http://labshare.cshl.edu/shares/mhammelllab/www->

1039 [data/TEToolkit/TE\\_GTF/hg19\\_rmsk\\_TE.gtf.gz](http://labshare.cshl.edu/shares/mhammelllab/www-data/TEToolkit/TE_GTF/hg19_rmsk_TE.gtf.gz)

1040 Repeat elements (*RepBase20.07*) – <http://www.girinst.org/replib/>

1041 V(D)J genes of *B* and *T* cell receptor - <http://www.imgt.org/vquest/refseqh.html#V-D-J-C->

1042 [sets](#)

1043 Database of viral genomes: <http://ftp.ncbi.nlm.nih.gov/genomes/Viruses>

1044 Database of bacterial genomes: <http://ftp.ncbi.nlm.nih.gov/genomes/Bacteria/>

1045 Database of eukaryotic pathogens - <http://eupathdb.org/eupathdb/>

1046

1047 **References:**

- 1048 Adiconis, X., Borges-Rivera, D., Satija, R., DeLuca, D. S., Busby, M. A., Berlin, A. M., ... others.  
1049 (2013). Comparative analysis of RNA sequencing methods for degraded or low-input  
1050 samples. *Nature Methods*, 10(7), 623–629.
- 1051 Anders, S., Pyl, P. T., & Huber, W. (2014). HTSeq--A Python framework to work with high-  
1052 throughput sequencing data. *Bioinformatics*, btu638.
- 1053 Andrews, S. (2010). FastQC: A quality control tool for high throughput sequence data.  
1054 Retrieved from <http://www.bioinformatics.babraham.ac.uk/projects/fastqc/>
- 1055 Ardlie, K. G., Deluca, D. S., Segrè, A. V, Sullivan, T. J., Young, T. R., Gelfand, E. T., ... others.  
1056 (2015). The Genotype-Tissue Expression (GTEx) pilot analysis: Multitissue gene  
1057 regulation in humans. *Science*, 348(6235), 648–660.
- 1058 Beck, J. M., Young, V. B., & Huffnagle, G. B. (2012). The microbiome of the lung.  
1059 *Translational Research : The Journal of Laboratory and Clinical Medicine*, 160(4), 258–  
1060 66. <https://doi.org/10.1016/j.trsl.2012.02.005>
- 1061 Blachly, J. S., Ruppert, A. S., Zhao, W., Long, S., Flynn, J., Flinn, I., ... others. (2015).  
1062 Immunoglobulin transcript sequence and somatic hypermutation computation from  
1063 unselected RNA-seq reads in chronic lymphocytic leukemia. *Proceedings of the*  
1064 *National Academy of Sciences*, 112(14), 4322–4327.
- 1065 Bunge, J., & Fitzpatrick, M. (1993). Estimating the number of species: a review. *Journal of*  
1066 *the American Statistical Association*, 88(421), 364–373.
- 1067 Camacho, C., Coulouris, G., Avagyan, V., Ma, N., Papadopoulos, J., Bealer, K., & Madden, T.  
1068 L. (2009). BLAST+: architecture and applications. *BMC Bioinformatics*, 10(1), 421.

1069 Carrara, M., Beccuti, M., Cavallo, F., Donatelli, S., Lazzarato, F., Cordero, F., & Calogero, R.  
1070 A. (2013). State of art fusion-finder algorithms are suitable to detect transcription-  
1071 induced chimeras in normal tissues? *BMC Bioinformatics*, *14*(7), 1.

1072 Chuang, T.-J., Wu, C.-S., Chen, C.-Y., Hung, L.-Y., Chiang, T.-W., & Yang, M.-Y. (2015).  
1073 NCLscan: accurate identification of non-co-linear transcripts (fusion, trans-splicing  
1074 and circular RNA) with a good balance between sensitivity and precision. *Nucleic Acids*  
1075 *Research*, gkv1013.

1076 Cloonan, N., Forrest, A. R. R., Kolle, G., Gardiner, B. B. A., Faulkner, G. J., Brown, M. K., ...  
1077 others. (2008). Stem cell transcriptome profiling via massive-scale mRNA sequencing.  
1078 *Nature Methods*, *5*(7), 613–619.

1079 Colwell, R. K., & Coddington, J. A. (1994). Estimating terrestrial biodiversity through  
1080 extrapolation. *Philosophical Transactions of the Royal Society B: Biological Sciences*,  
1081 *345*(1311), 101–118.

1082 Criscione, S. W., Zhang, Y., Thompson, W., Sedivy, J. M., & Neretti, N. (2014).  
1083 Transcriptional landscape of repetitive elements in normal and cancer human cells.  
1084 *BMC Genomics*, *15*(1), 583. <https://doi.org/10.1186/1471-2164-15-583>

1085 Daley, T. P. (2014). *Non-parametric Models for Large Capture-recapture Experiments with*  
1086 *Applications to DNA Sequencing*. University of Southern California.

1087 Daley, T., & Smith, A. D. (2013). Predicting the molecular complexity of sequencing  
1088 libraries. *Nature Methods*, *10*(4), 325–327.

1089 Deng, C., Daley, T., & Smith, A. D. (n.d.). Applications of species accumulation curves in  
1090 large-scale biological data analysis. *Journal of Quantitative Biology*.



1091 Engström, P. G., Steijger, T., Sipos, B., Grant, G. R., Kahles, A., Rättsch, G., ... others. (2013).  
1092 Systematic evaluation of spliced alignment programs for RNA-seq data. *Nature*  
1093 *Methods*, 10(12), 1185–1191.

1094 Favaro, S., Lijoi, A., & Prünster, I. (2012). A new estimator of the discovery probability.  
1095 *Biometrics*, 68(4), 1188–1196.

1096 Good, I. J. (1953). The population frequencies of species and the estimation of population  
1097 parameters. *Biometrika*, 40(3–4), 237–264.

1098 Grabherr, M. G., Haas, B. J., Yassour, M., Levin, J. Z., Thompson, D. A., Amit, I., ... Regev, A.  
1099 (2011). Full-length transcriptome assembly from RNA-Seq data without a reference  
1100 genome. *Nature Biotechnology*, 29(7), 644–52. <https://doi.org/10.1038/nbt.1883>

1101 Hach, F., Hormozdiari, F., Alkan, C., Hormozdiari, F., Birol, I., Eichler, E. E., & Sahinalp, S. C.  
1102 (2010). mrsFAST: a cache-oblivious algorithm for short-read mapping. *Nature*  
1103 *Methods*, 7(8), 576–577.

1104 Hansen, T. B., Venø, M. T., Damgaard, C. K., & Kjems, J. (2015). Comparison of circular RNA  
1105 prediction tools. *Nucleic Acids Research* . <https://doi.org/10.1093/nar/gkv1458>

1106 Inman, C. F., Murray, T. Z., Bailey, M., & Cose, S. (2012). Most B cells in non-lymphoid  
1107 tissues are naïve. *Immunology and Cell Biology*, 90(2), 235–242.  
1108 <https://doi.org/10.1038/icb.2011.35>

1109 Jeck, W. R., & Sharpless, N. E. (2014). Detecting and characterizing circular RNAs. *Nature*  
1110 *Biotechnology*, 32(5), 453–61. <https://doi.org/10.1038/nbt.2890>

1111 Jin, Y., Tam, O. H., Paniagua, E., & Hammell, M. (2015). TEtranscripts: a package for  
1112 including transposable elements in differential expression analysis of RNA-seq  
1113 datasets. *Bioinformatics*, *btv422*.

1114 Kim, D., Pertea, G., Trapnell, C., Pimentel, H., Kelley, R., & Salzberg, S. L. (2013). TopHat2:  
1115 accurate alignment of transcriptomes in the presence of insertions, deletions and  
1116 gene fusions. *Genome Biology*, *14*(4), R36. <https://doi.org/10.1186/gb-2013-14-4-r36>

1117 Kostic, A. D., Ojesina, A. I., Pedamallu, C. S., Jung, J., Verhaak, R. G. W., Getz, G., &  
1118 Meyerson, M. (2011). PathSeq: software to identify or discover microbes by deep  
1119 sequencing of human tissue. *Nature Biotechnology*, *29*(5), 393–396.

1120 Li, S., Tighe, S. W., Nicolet, C. M., Grove, D., Levy, S., Farmerie, W., ... others. (2014). Multi-  
1121 platform assessment of transcriptome profiling using RNA-seq in the ABRF next-  
1122 generation sequencing study, *32*(9), 915–925. <https://doi.org/10.1038/nbt.2972>

1123 Mao, C. X. (2004). Predicting the conditional probability of discovering a new class. *Journal*  
1124 *of the American Statistical Association*, *99*(468).

1125 Melé, M., Ferreira, P. G., Reverter, F., DeLuca, D. S., Monlong, J., Sammeth, M., ... others.  
1126 (2015). The human transcriptome across tissues and individuals. *Science*, *348*(6235),  
1127 660–665.

1128 Mihaela Pertea, J. T. M. S. L. S. (2015). StringTie enables improved reconstruction of a  
1129 transcriptome from RNA-seq reads. *Nature Biotechnology*, *33*, 290–295.  
1130 <https://doi.org/10.1038/nbt.3122>

1131 Nicolae, M., Mangul, S., Mandoiu, I. I., & Zelikovsky, A. (2011). Estimation of alternative  
1132 splicing isoform frequencies from RNA-Seq data. *Algorithms for Molecular Biology*,  
1133 6(1), 9.

1134 Ozsolak, F., & Milos, P. M. (2011). RNA sequencing: advances, challenges and  
1135 opportunities. *Nature Reviews. Genetics*, 12(2), 87–98.  
1136 <https://doi.org/10.1038/nrg2934>

1137 Peruchon, S., Chaoul, N., Burelout, C., Delache, B., Brochard, P., Laurent, P., ... Richard, Y.  
1138 (2009). Tissue-specific B-cell dysfunction and generalized memory B-cell loss during  
1139 acute SIV infection. *PLoS ONE*, 4(6), e5966.  
1140 <https://doi.org/10.1371/journal.pone.0005966>

1141 Porath, H. T., Carmi, S., & Levanon, E. Y. (2014). A genome-wide map of hyper-edited RNA  
1142 reveals numerous new sites. *Nature Communications*, 5, 4726.  
1143 <https://doi.org/10.1038/ncomms5726>

1144 Salter, S. J., Cox, M. J., Turek, E. M., Calus, S. T., Cookson, W. O., Moffatt, M. F., ... Walker,  
1145 A. W. (2014). Reagent and laboratory contamination can critically impact sequence-  
1146 based microbiome analyses. *BMC Biology*, 12(1), 87.

1147 Seqc/Maqc-iii Consortium. (2014). A comprehensive assessment of RNA-seq accuracy,  
1148 reproducibility and information content by the Sequencing Quality Control  
1149 Consortium. *Nature Biotechnology*, 32(9), 903–914.  
1150 <https://doi.org/10.1038/nbt.2957>

1151 Siragusa, E., Weese, D., & Reinert, K. (2013). Fast and accurate read mapping with  
1152 approximate seeds and multiple backtracking. *Nucleic Acids Research*, 41(7), e78--  
1153 e78.

1154 Spreafico, R., Rossetti, M., van Loosdregt, J., Wallace, C. A., Massa, M., Magni-Manzoni, S.,  
1155 ... Albani, S. (2016). A circulating reservoir of pathogenic-like CD4+ T cells shares a  
1156 genetic and phenotypic signature with the inflamed synovial micro-environment.  
1157 *Annals of the Rheumatic Diseases*, 75(2), 459–465.

1158 Strauli, N., & Hernandez, R. (2015). Statistical Inference of a Convergent Antibody  
1159 Repertoire Response to Influenza Vaccine. *bioRxiv*, 25098.

1160 Sultan, M., Schulz, M. H., Richard, H., Magen, A., Klingenhoff, A., Scherf, M., ... others.  
1161 (2008). A global view of gene activity and alternative splicing by deep sequencing of  
1162 the human transcriptome. *Science*, 321(5891), 956–960.

1163 Tang, F., Barbacioru, C., Wang, Y., Nordman, E., Lee, C., Xu, N., ... others. (2009). mRNA-  
1164 Seq whole-transcriptome analysis of a single cell. *Nature Methods*, 6(5), 377–382.

1165 Tarailo-Graovac, M., & Chen, N. (2009). Using RepeatMasker to identify repetitive  
1166 elements in genomic sequences. *Current Protocols in Bioinformatics*, 4–10.

1167 Trapnell, C., Williams, B. a, Pertea, G., Mortazavi, A., Kwan, G., van Baren, M. J., ... Pachter,  
1168 L. (2010). Transcript assembly and quantification by RNA-Seq reveals unannotated  
1169 transcripts and isoform switching during cell differentiation. *Nature Biotechnology*,  
1170 28(5), 511–515. <https://doi.org/10.1038/nbt.1621>

1171 Truong, D. T., Franzosa, E. A., Tickle, T. L., Scholz, M., Weingart, G., Pasolli, E., ... Segata, N.  
1172 (2015). MetaPhlan2 for enhanced metagenomic taxonomic profiling. *Nature*  
1173 *Methods*, 12(10), 902–903.

1174 Wang, X.-S., Prensner, J. R., Chen, G., Cao, Q., Han, B., Dhanasekaran, S. M., ... Chinnaiyan,  
1175 A. M. (2009). An integrative approach to reveal driver gene fusions from paired-end  
1176 sequencing data in cancer. *Nature Biotechnology*, 27(11), 1005–11.  
1177 <https://doi.org/10.1038/nbt.1584>

1178 Wang, Z., Gerstein, M., & Snyder, M. (2009). RNA-Seq: a revolutionary tool for  
1179 transcriptomics. *Nature Reviews Genetics*, 10(1), 57–63.

1180 Wu, C.-S., Yu, C.-Y., Chuang, C.-Y., Hsiao, M., Kao, C.-F., Kuo, H.-C., & Chuang, T.-J. (2014).  
1181 Integrative transcriptome sequencing identifies trans-splicing events with important  
1182 roles in human embryonic stem cell pluripotency. *Genome Research*, 24(1), 25–36.

1183 Yan, M., Pamp, S. J., Fukuyama, J., Hwang, P. H., Cho, D. Y., Holmes, S., & Relman, D. a.  
1184 (2013). Nasal microenvironments and interspecific interactions influence nasal  
1185 microbiota complexity and *S. aureus* carriage. *Cell Host and Microbe*, 14(6), 631–640.  
1186 <https://doi.org/10.1016/j.chom.2013.11.005>

1187 Ye, J., Ma, N., Madden, T. L., & Ostell, J. M. (2013). IgBLAST: an immunoglobulin variable  
1188 domain sequence analysis tool. *Nucleic Acids Research*, gkt382.

1189 Zhang, X.-O., Dong, R., Zhang, Y., Zhang, J.-L., Luo, Z., Zhang, J., ... Yang, L. (2016). Diverse  
1190 alternative back-splicing and alternative splicing landscape of circular RNAs. *Genome*  
1191 *Research*. <https://doi.org/10.1101/gr.202895.115>

1192
